# Supplementary material for: Modulation of the chain-breaking antioxidant activity of phenolic organochalcogens with various co-antioxidants at various pH values
Source: Royal Society of Chemistry journal article supplement (doi:10.1039/d2ob01988d), 2023-01-01

## Supporting Information

For

### Modulation of Chain-Breaking Antioxidant Activity of Phenolic Organochalcogens at Various pH and Co-antioxidants

Manish Kumar, Deepika Sharma, and Vijay P. Singh\*

Department of Chemistry & Centre of Advanced Studies in Chemistry, Panjab University,  
Sector-14, Chandigarh – 160 014, India

\*E-mail: vijay@pu.ac.in

#### ---Table of Contents---

- p S3 **Figure S1.** The  $R_{inh}$  profile of antioxidant **8** using NAC as co-antioxidant at pH 1-7 (HCl/NaOH regulated)
- pS3 **Figure S2.** The  $T_{inh}$  profile of antioxidant **8** using NAC as co-antioxidant at pH 1-7 (HCl/NaOH regulated).
- pS4 **Figure S3.** The  $R_{inh}$  profile of antioxidant **9** using NAC as co-antioxidant at pH 1-7 (HCl/NaOH regulated)
- pS4 **Figure S4.** The  $T_{inh}$  profile of antioxidant **9** using NAC as co-antioxidant at pH 1-7 (HCl/NaOH regulated).
- pS5 **Figure S5.** Control experiment without antioxidants (**8** and **9**) using NAC
- pS5 **Figure S6.** Control experiment without antioxidants (**8** and **9**) using GSH
- pS6 **Figure S7.** Control experiment without antioxidants (**8** and **9**) using DTT
- pS6 **Figure S8.** Control experiment without antioxidants (**8** and **9**) using AscOH
- pS7 **Figure S9.** Control without antioxidants (**8** and **9**) using Sodium ascorbate
- pS7 **Figure S10.** Control without antioxidants (**8** and **9**) using  $K_4[Fe(CN)_6].3H_2O$
- pS8 **Figure S11.** Control without antioxidants (**8** and **9**) using  $K_4[Fe(CN)_6].3H_2O$  + PTC
- pS8 **Figure S12.** Control experiment without antioxidants (**8** and **9**) using  $Na_2S_2O_3$
- pS9 **Figure S13.** Control experiment without antioxidants (**8** and **9**) using  $Na_2S_2O_3$  +PTC
- pS9 **Figure S14.**Control experiment without antioxidants (**8** and **9**) using TCEP
- pS10 **Figure S15.** Experiment with antioxidant **8** using GSH
- pS11 **Figure S16.** Experiment with antioxidant **8** using DTT

- pS12 **Figure S17.** Experiment with antioxidant **8** using AscOH
- pS12 **Figure S18.** Experiment with antioxidant **8** using sodium ascorbate
- pS13 **Figure S19.** Experiment with antioxidant **8** using  $K_4[Fe(CN)_6].3H_2O$
- pS13 **Figure S20.** Experiment with antioxidant **8** using  $K_4[Fe(CN)_6].3H_2O + PTC$
- pS14 **Figure S21.** Experiment with antioxidant **8** using PCET
- pS15 **Figure S22.** Experiment with antioxidant **8** using NAC pH = 1
- pS16 **Figure S23.** Experiment with antioxidant **8** using NAC pH = 2
- pS17 **Figure S24.** Experiment with antioxidant **8** using NAC pH = 3
- pS18 **Figure S25.** Experiment with antioxidant **8** using NAC pH = 4
- pS19 **Figure S26.** Experiment with antioxidant **8** using NAC pH = 5
- pS20 **Figure S27.** Experiment with antioxidant **8** using NAC pH = 6
- pS21 **Figure S28.** Experiment with antioxidant **8** using NAC pH = 7
- pS22 **Figure S29.** Experiment with antioxidant **9** using Ascorbic Acid
- pS23 **Figure S30.** Experiment with antioxidant **9** using DTT
- pS24 **Figure S31.** Experiment with antioxidant **9** using NAC
- pS25 **Figure S32.** Experiment with antioxidant **9** using  $K_4Fe(CN)_6.4H_2O$
- pS26 **Figure S33.** Experiment with antioxidant **9** using PTCP
- pS27 **Figure S34.** Experiment with antioxidant **9** using Sodium Ascorbate
- pS28 **Figure S35.** Experiment with antioxidant **9** using  $K_4[Fe(CN)_6].3H_2O + PTC$
- pS29 **Figure S36.** Experiment with antioxidant **9** using GSH
- pS30 **Figure S37.** Experiment with antioxidant **9** using NAC pH = 1
- pS31 **Figure S38.** Experiment with antioxidant **9** using NAC pH = 2
- pS32 **Figure S39.** Experiment with antioxidant **9** using NAC pH = 3
- pS33 **Figure S40.** Experiment with antioxidant **9** using NAC pH = 4
- pS34 **Figure S41.** Experiment with antioxidant **9** using NAC pH = 5
- pS35 **Figure S42.** Experiment with antioxidant **9** using NAC pH = 6
- pS36 **Figure S43.** Experiment with antioxidant **9** using NAC pH = 7
- pS37 **Scheme S41.** Proposed mechanism for quenching of  $LOO\cdot$  by antioxidant **9** in the presence of aqueous co-antioxidants.

**Figure S1.** The  $R_{inh}$  profile of antioxidant **8** using NAC as co-antioxidant at pH 1-7 (HCl/NaOH regulated).

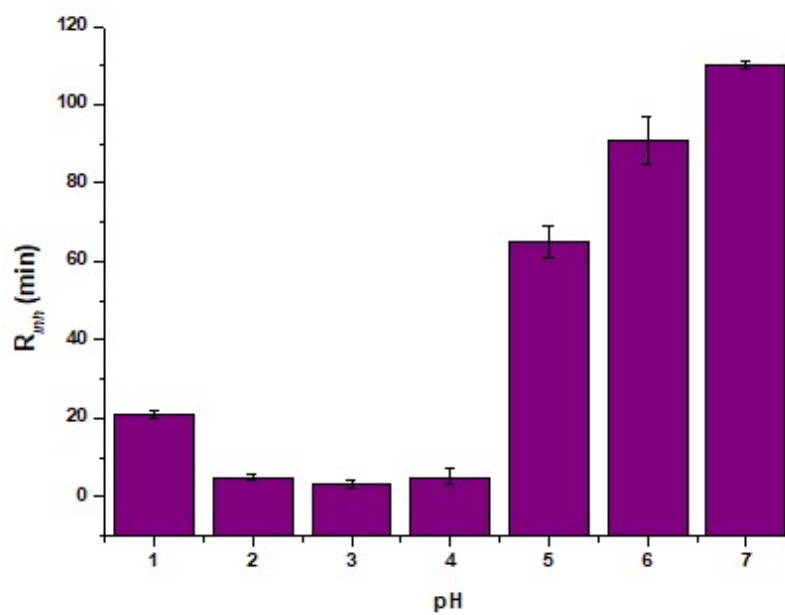

**Figure S2.** The  $T_{inh}$  profile of antioxidant **8** using NAC as co-antioxidant at pH 1-7 (HCl/NaOH regulated).

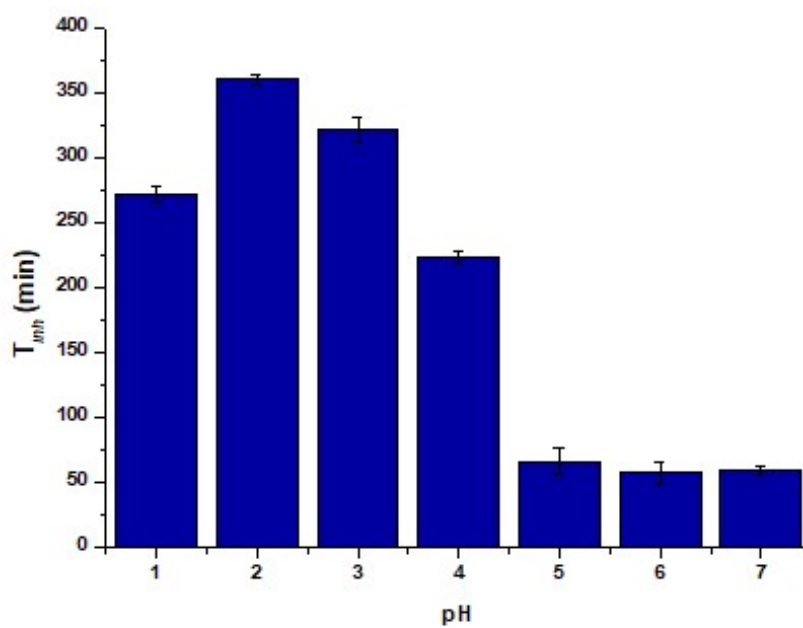

**Figure S3.** The  $R_{inh}$  profile of antioxidant **9** using NAC as co-antioxidant at pH 1-7 (HCl/NaOH regulated)

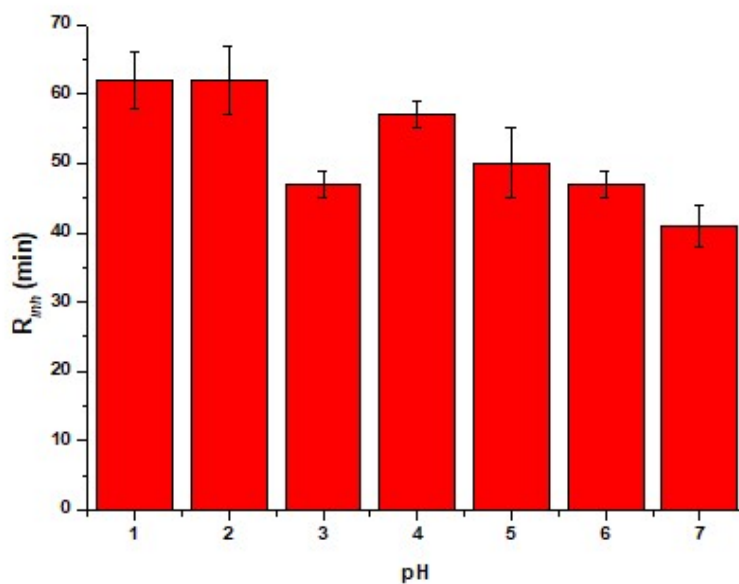

**Figure S4.** The  $T_{inh}$  profile of antioxidant **9** using NAC as co-antioxidant at pH 1-7 (HCl/NaOH regulated).

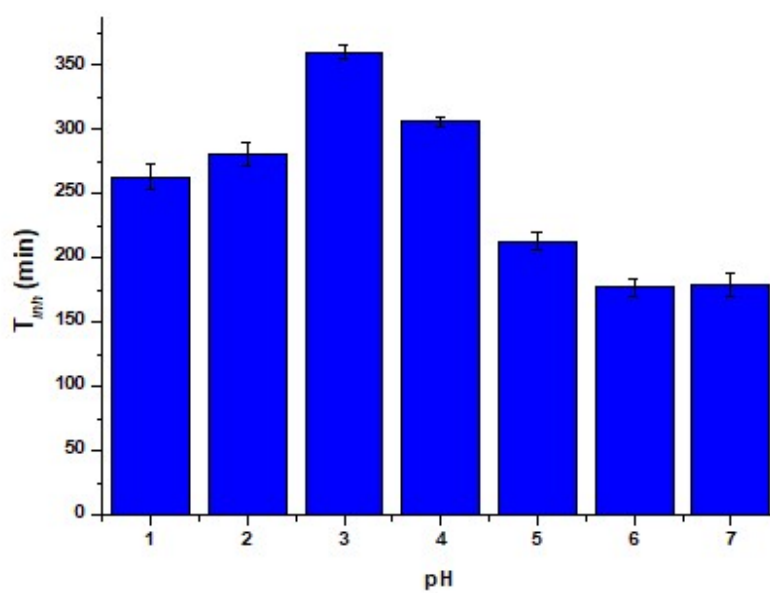

**Figure S5.** Control experiment without antioxidants (**8** and **9**) using NAC

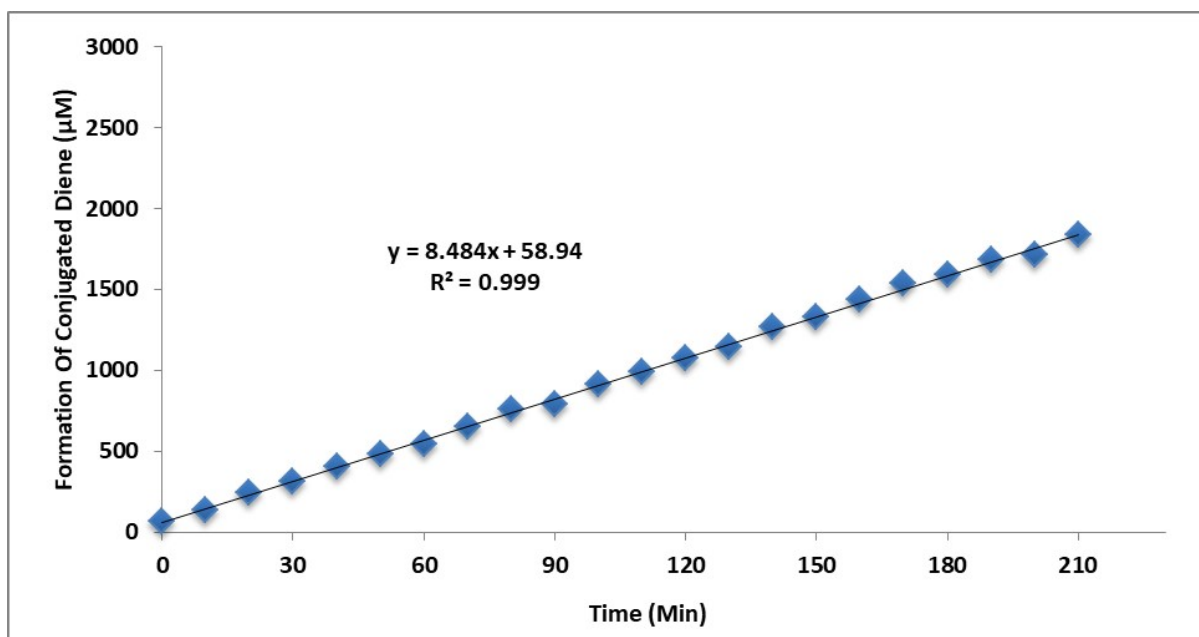

**Figure S6.** Control experiment without antioxidants (**8** and **9**) using GSH

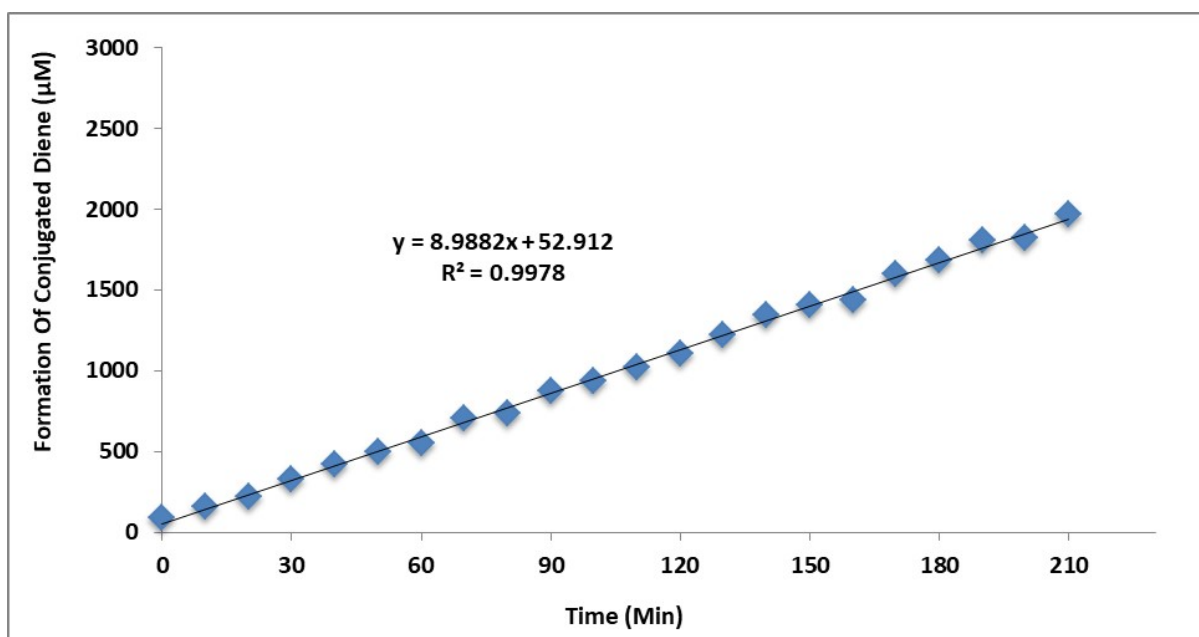

**Figure S7.** Control experiment without antioxidants (**8** and **9**) using DTT

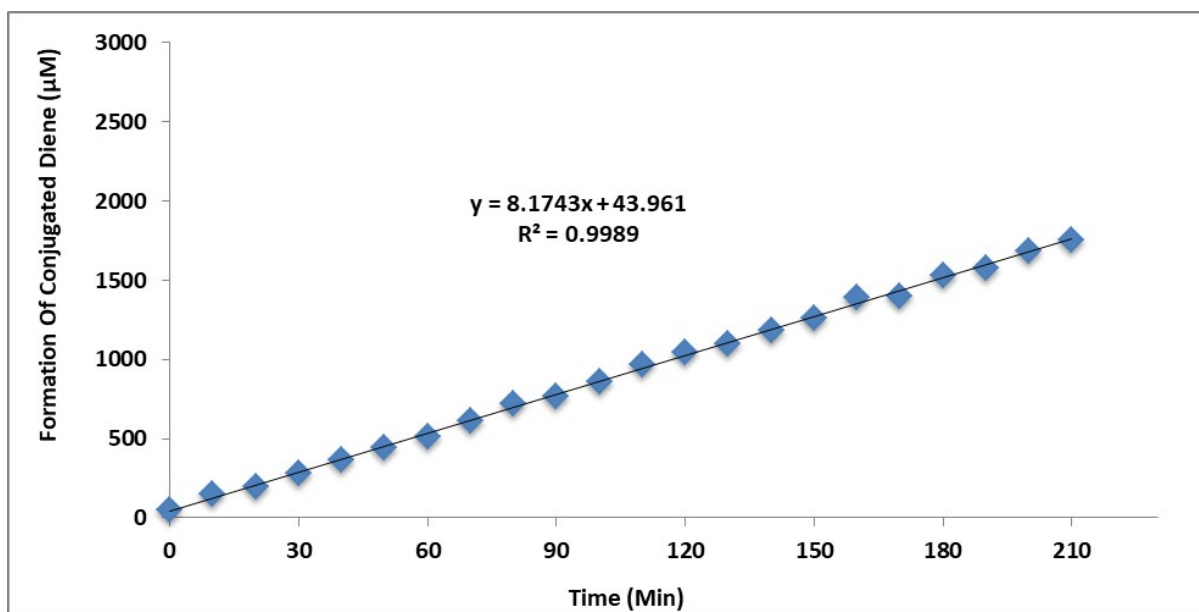

**Figure S8.** Control experiment without antioxidants (**8** and **9**) using AscOH

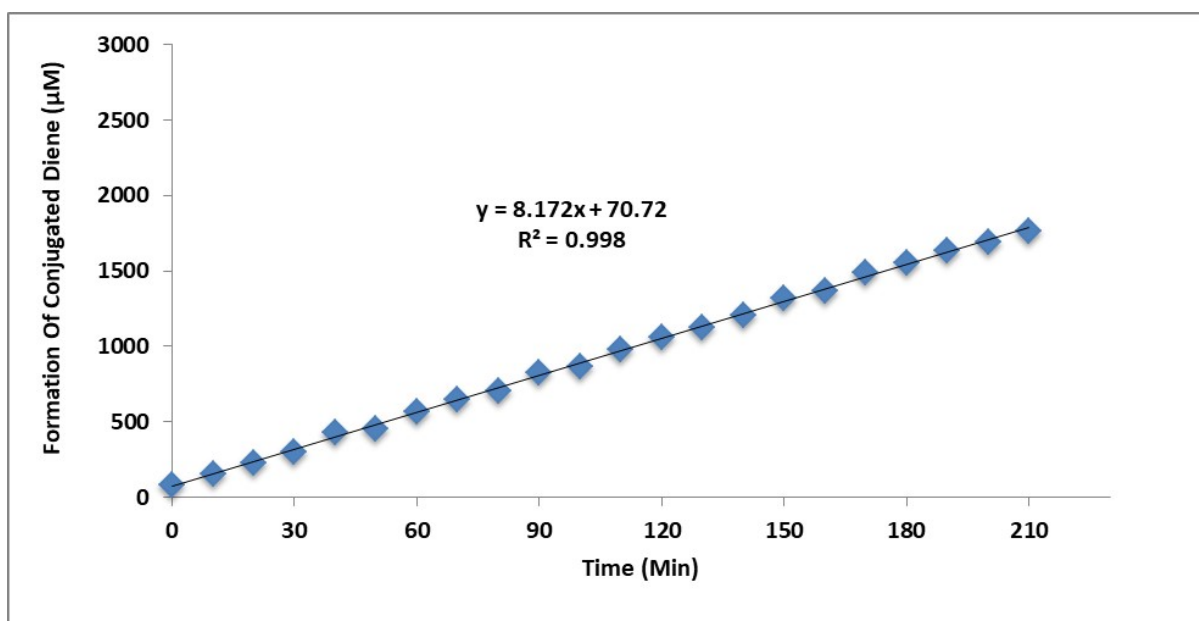

**Figure S9.** Control experiment without antioxidants (**8** and **9**) using sodium ascorbate

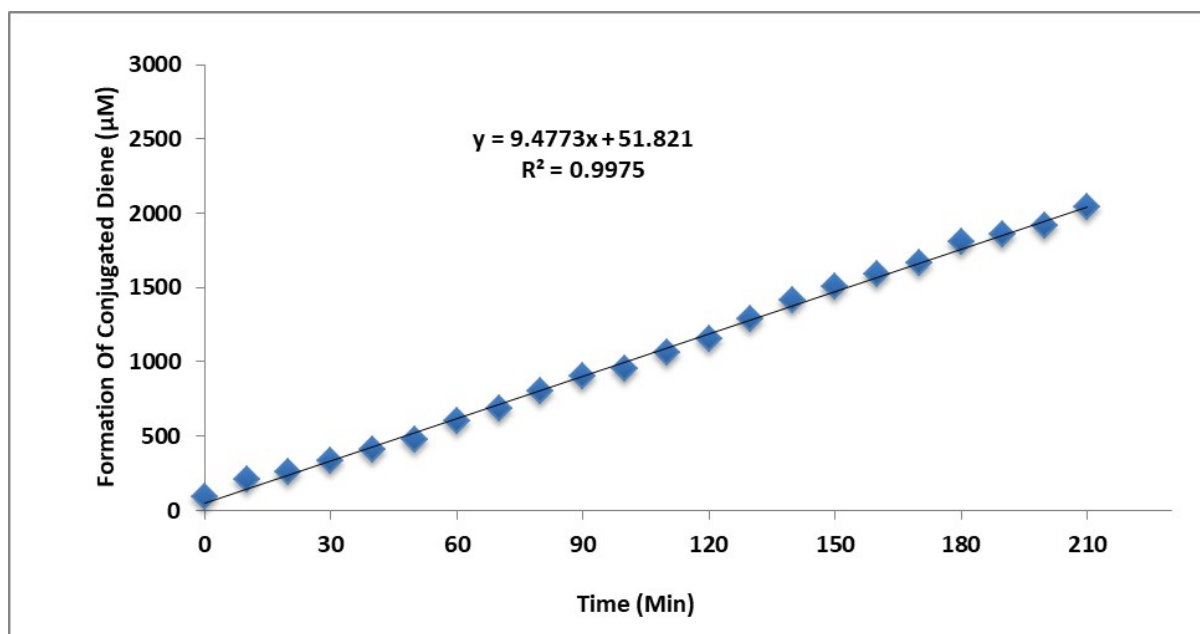

**Figure S10.** Control experiment without antioxidants (**8** and **9**) using  $\text{K}_4[\text{Fe}(\text{CN})_6] \cdot 3\text{H}_2\text{O}$

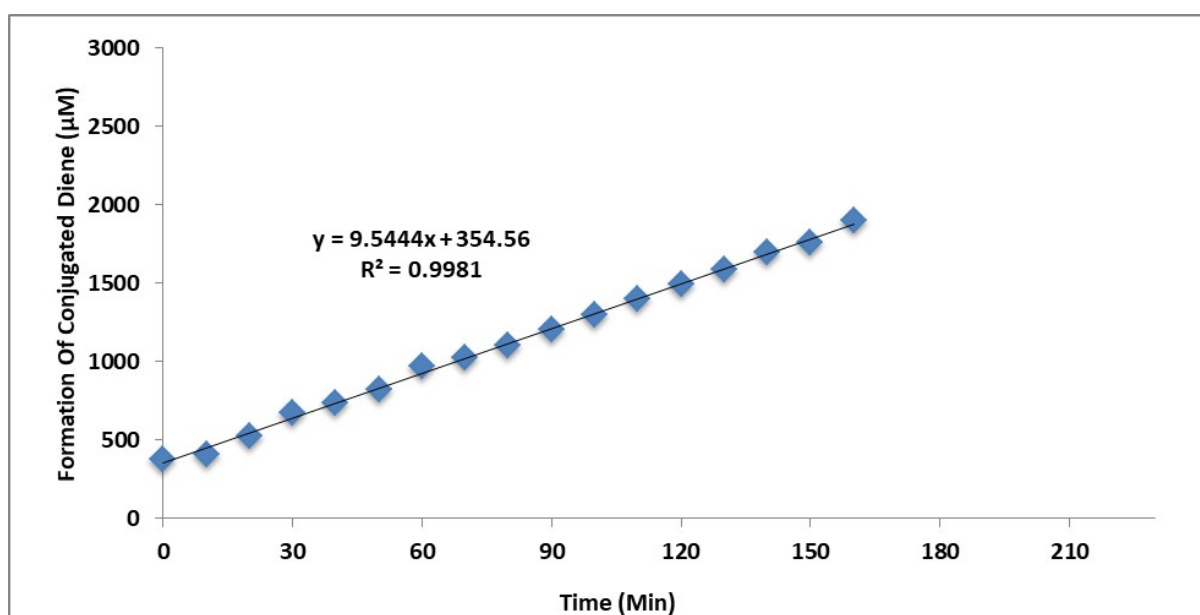

**Figure S11.** Control experiment without antioxidants (**8** and **9**) using  $K_4[Fe(CN)_6] \cdot 3H_2O$  + PTC

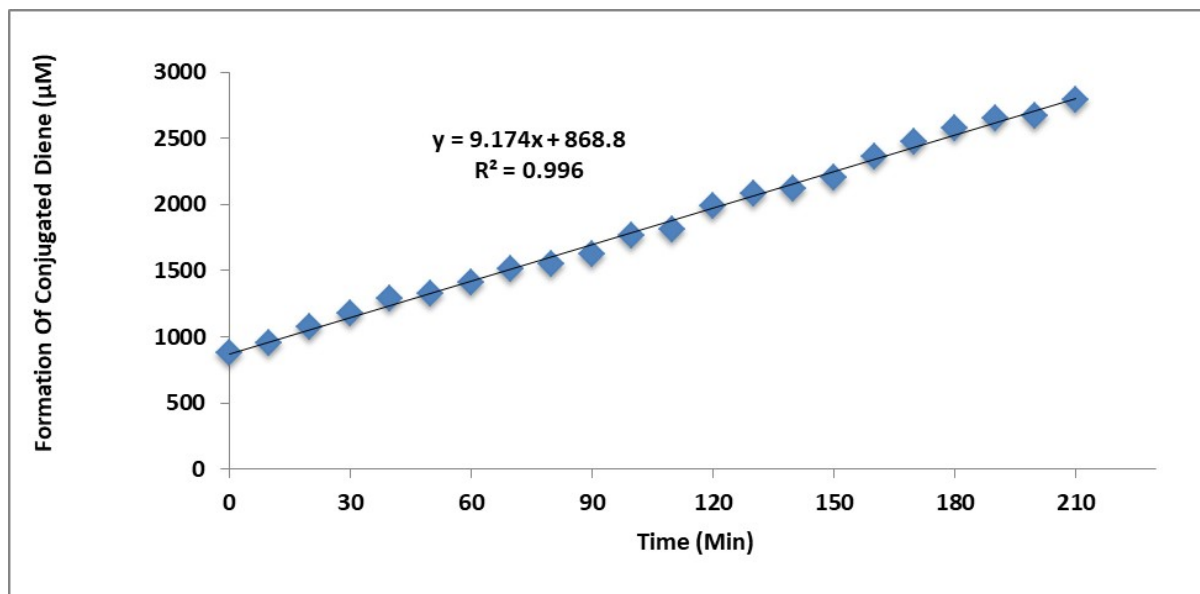

**Figure S12.** Control experiment without antioxidants (**8** and **9**) using  $Na_2S_2O_5$

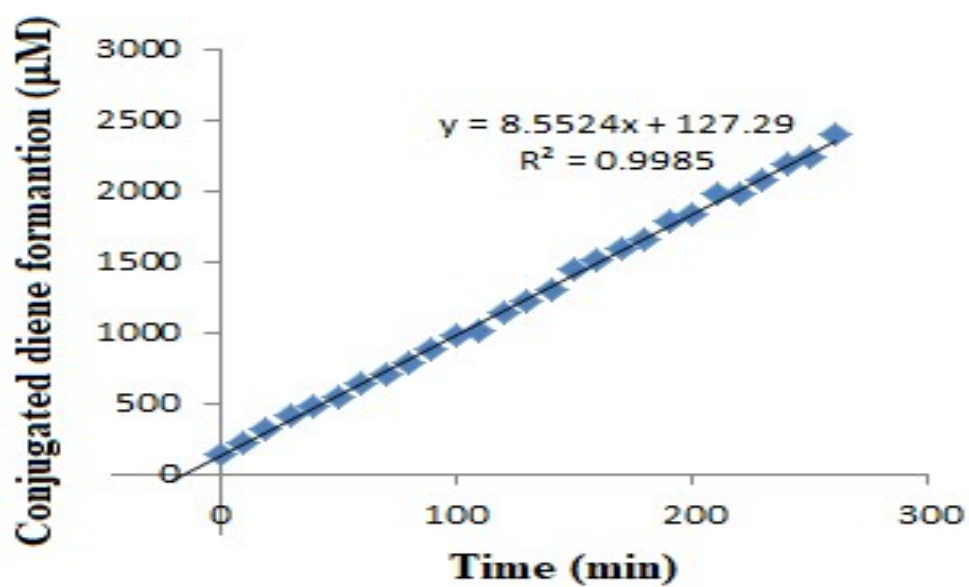



**Figure S13.** Control experiment without antioxidants (**8** and **9**) using  $\text{Na}_2\text{S}_2\text{O}_5$  + PTC

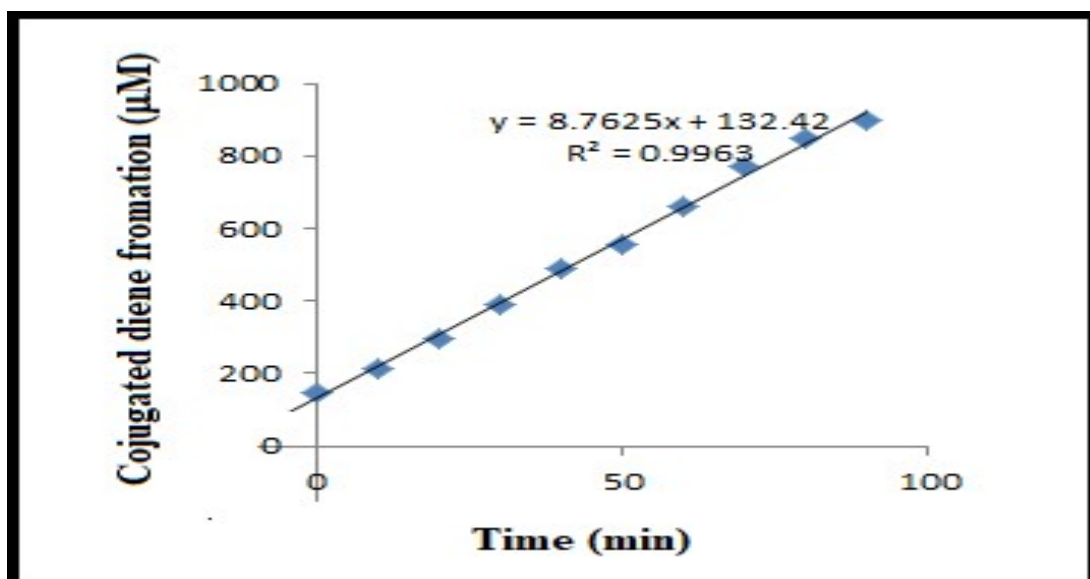

**Figure S14.** Control experiment without antioxidants (**8** and **9**) using TCEP

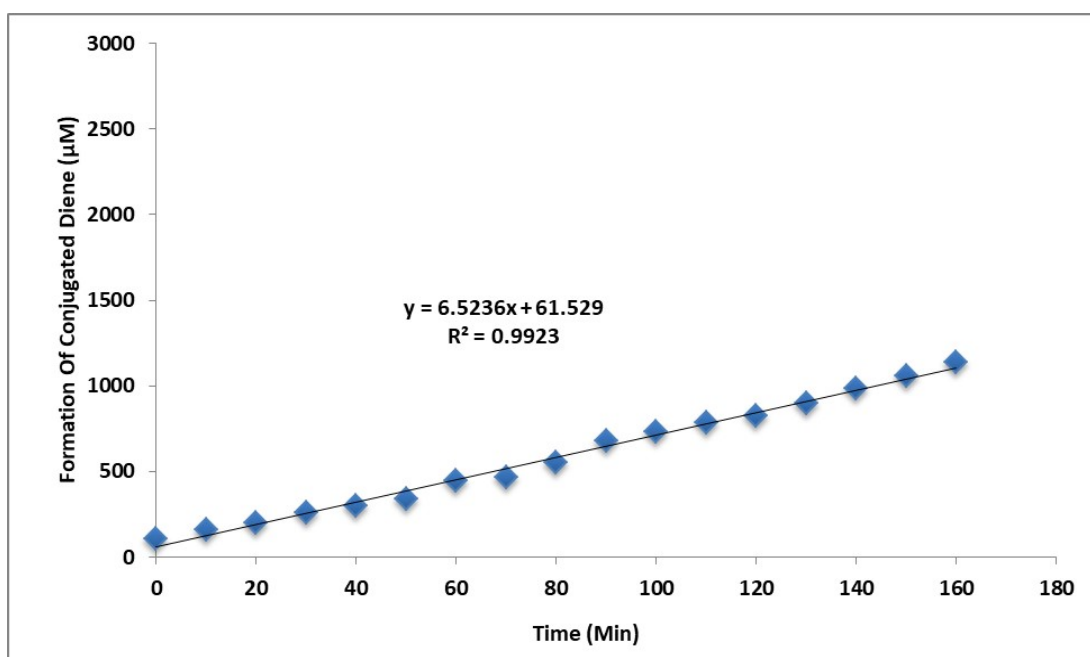

Figure S15. Experiment with antioxidant 8 using GSH

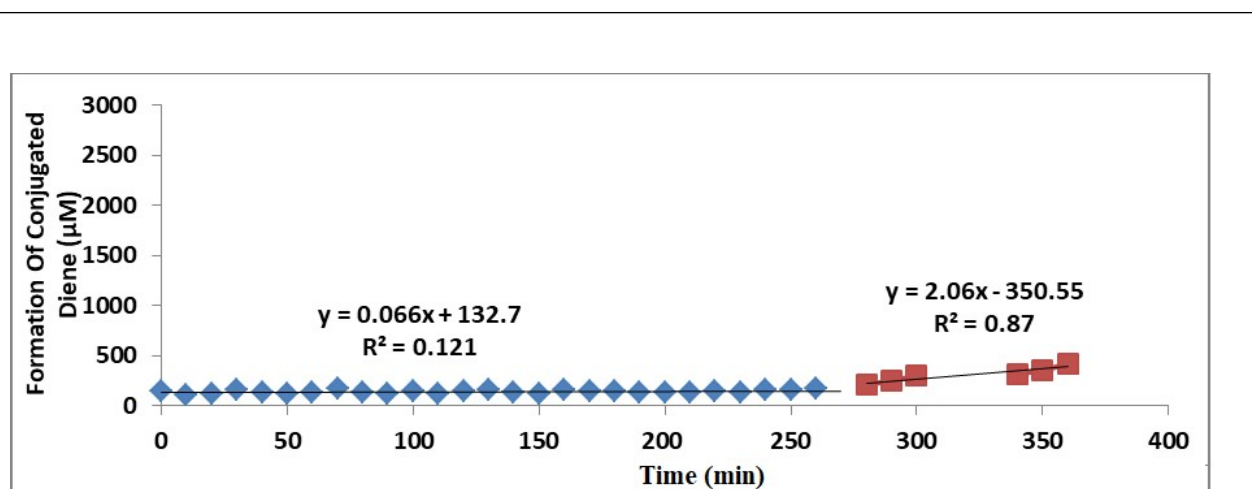

$R_{\text{inh}} = 3.96 \mu\text{M}/\text{min}$      $T_{\text{inh}} = 243 \text{ min}$

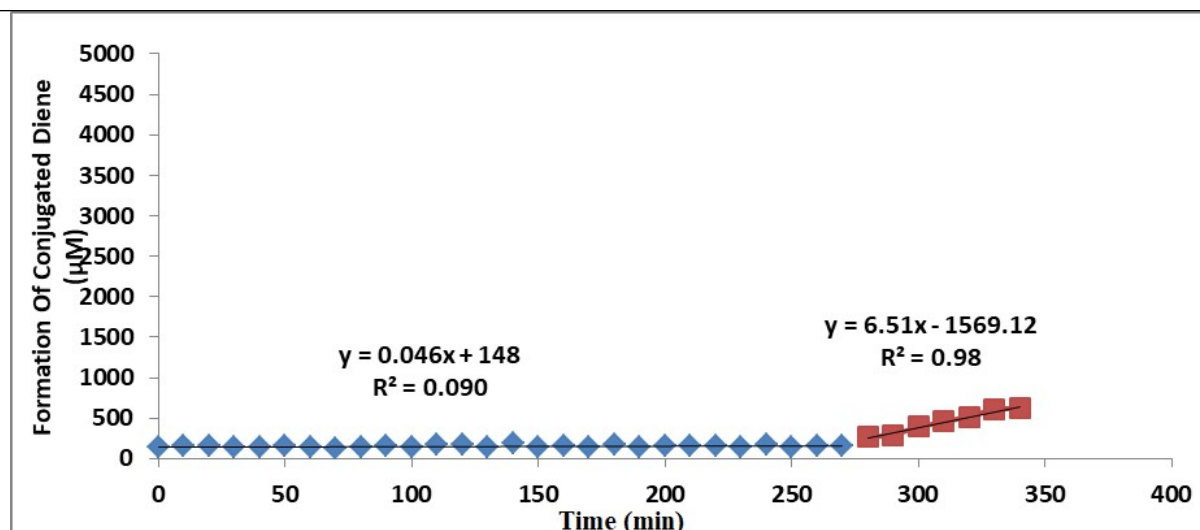

$R_{\text{inh}} = 2.76 \mu\text{M}/\text{min}$      $T_{\text{inh}} = 265 \text{ Min}$

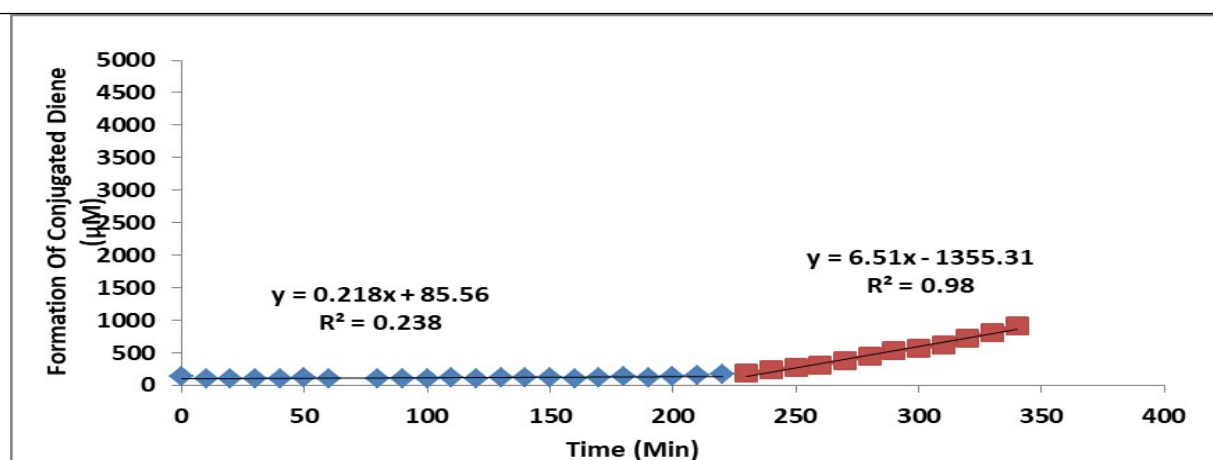

$R_{\text{inh}} = 2.8 \mu\text{M}/\text{min}$      $T_{\text{inh}} = 265 \text{ Min}$

Figure S16. Experiment with antioxidant 8 using DTT

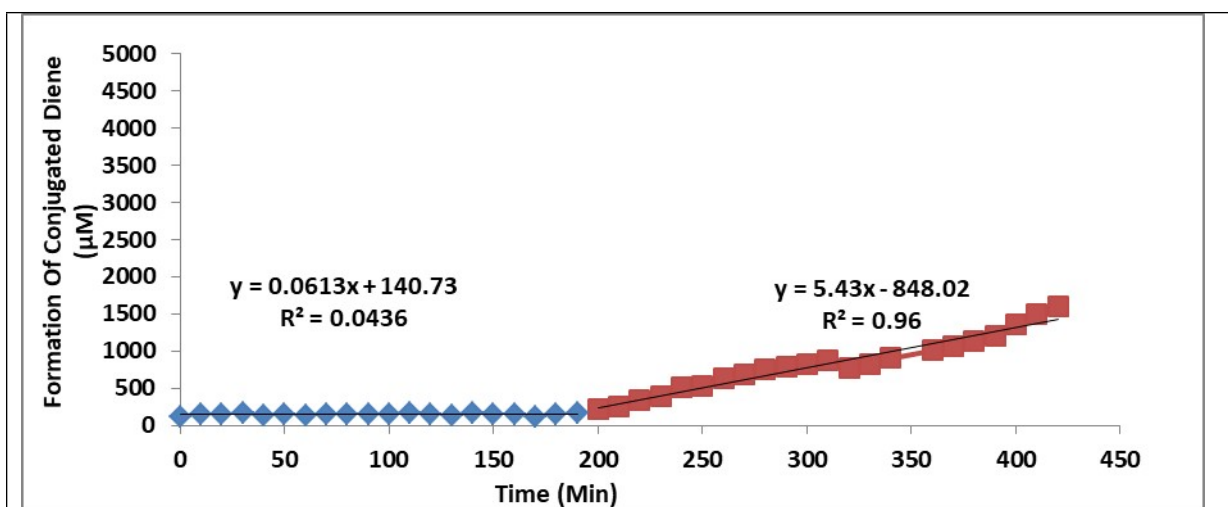

$R_{\text{inh}} = 3.66 \mu\text{M}/\text{min}$      $T_{\text{inh}} = 184 \text{ Min}$

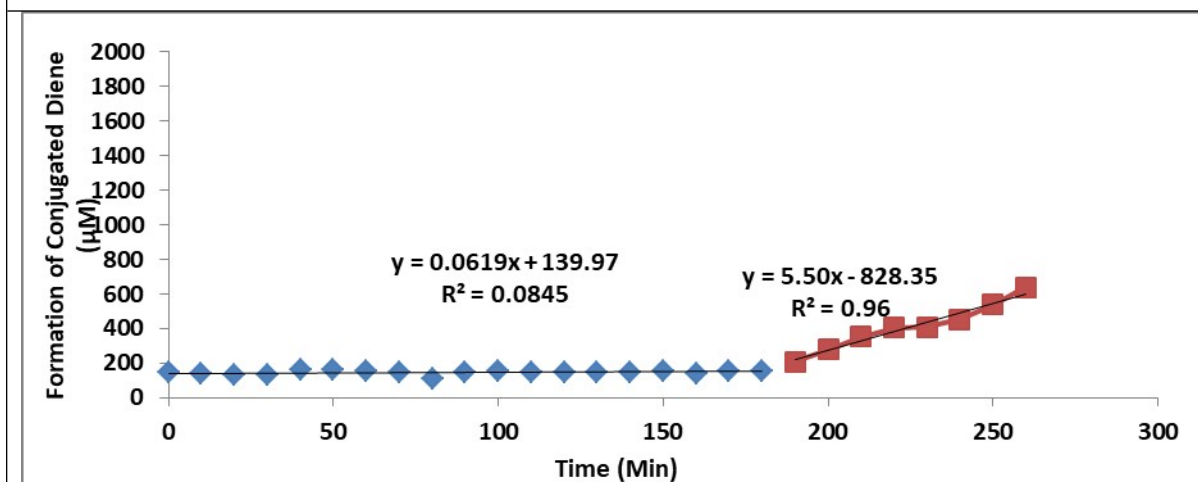

$R_{\text{inh}} = 3.76 \mu\text{M}/\text{min}$      $T_{\text{inh}} = 174 \text{ Min}$

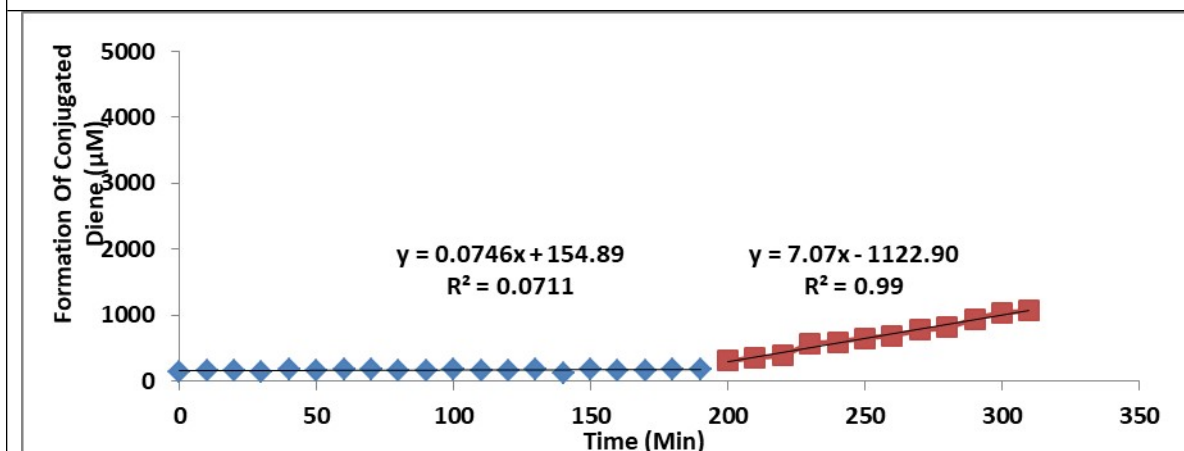

$R_{\text{inh}} = 4.44 \mu\text{M}/\text{min}$      $T_{\text{inh}} = 183 \text{ Min}$

**Figure S17.** Experiment with antioxidant **8** using AscOH

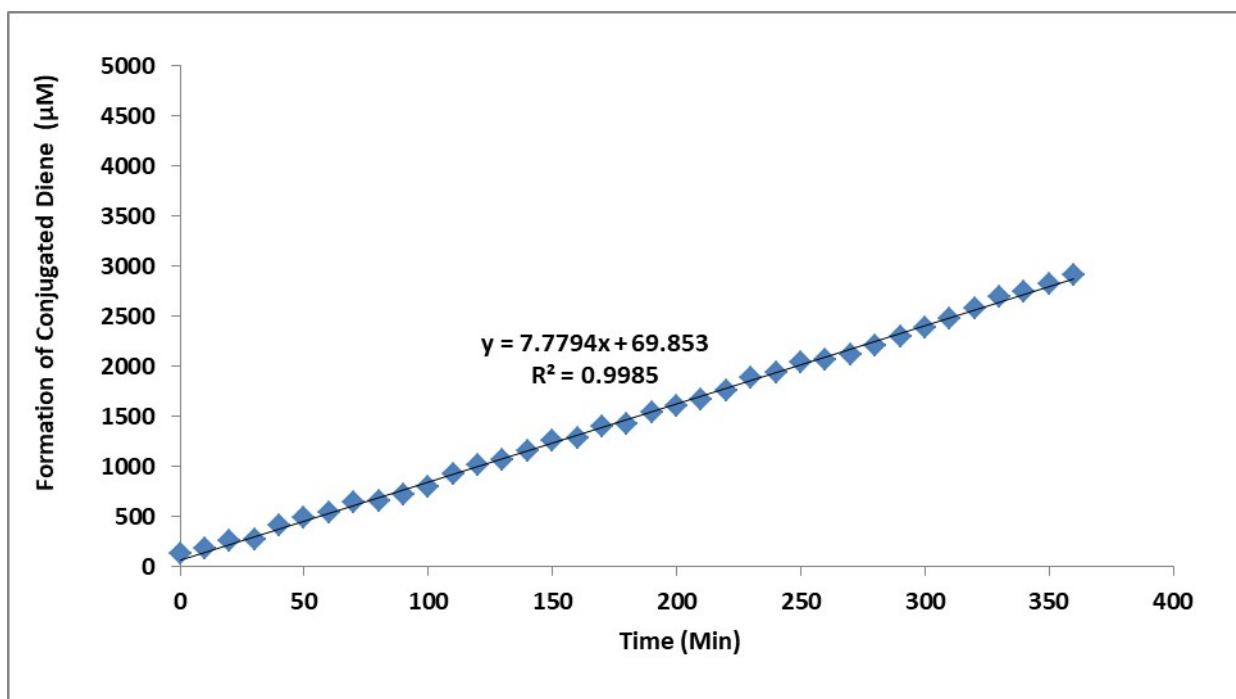

$R_{\text{inh}} = 466.74 \mu\text{M}/\text{min}$

**Figure S18.** Experiment with antioxidant **8** using sodium ascorbate

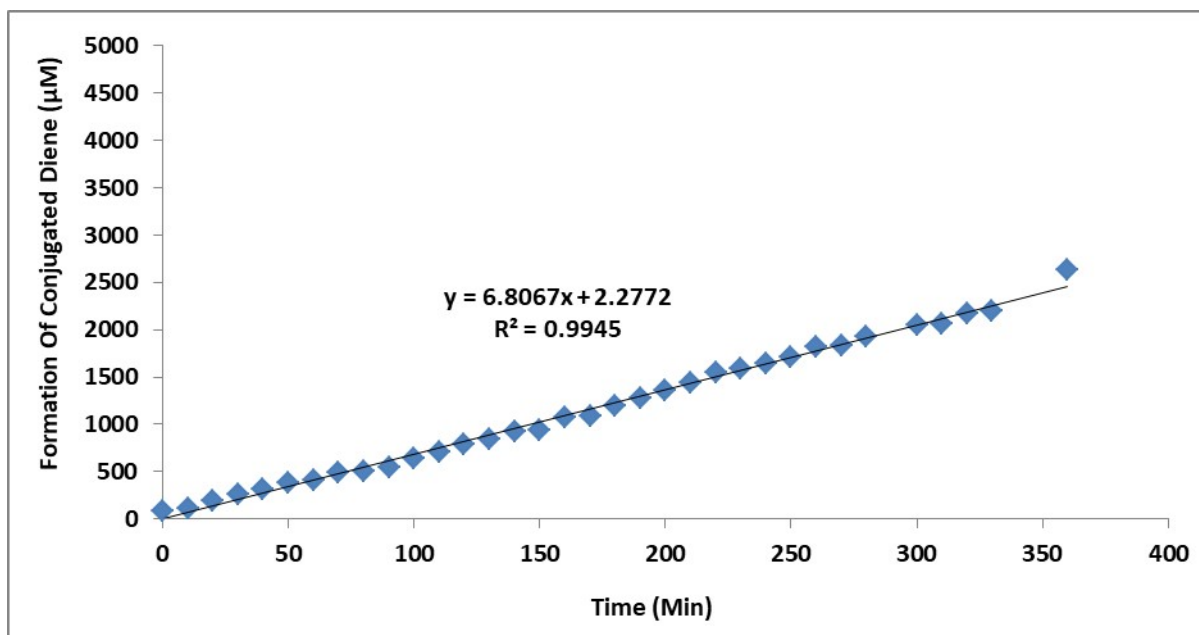

$R_{\text{inh}} = 408 \mu\text{M}/\text{min}$

**Figure S19.** Experiment with antioxidant **8** using  $K_4[Fe(CN)_6] \cdot 3H_2O$

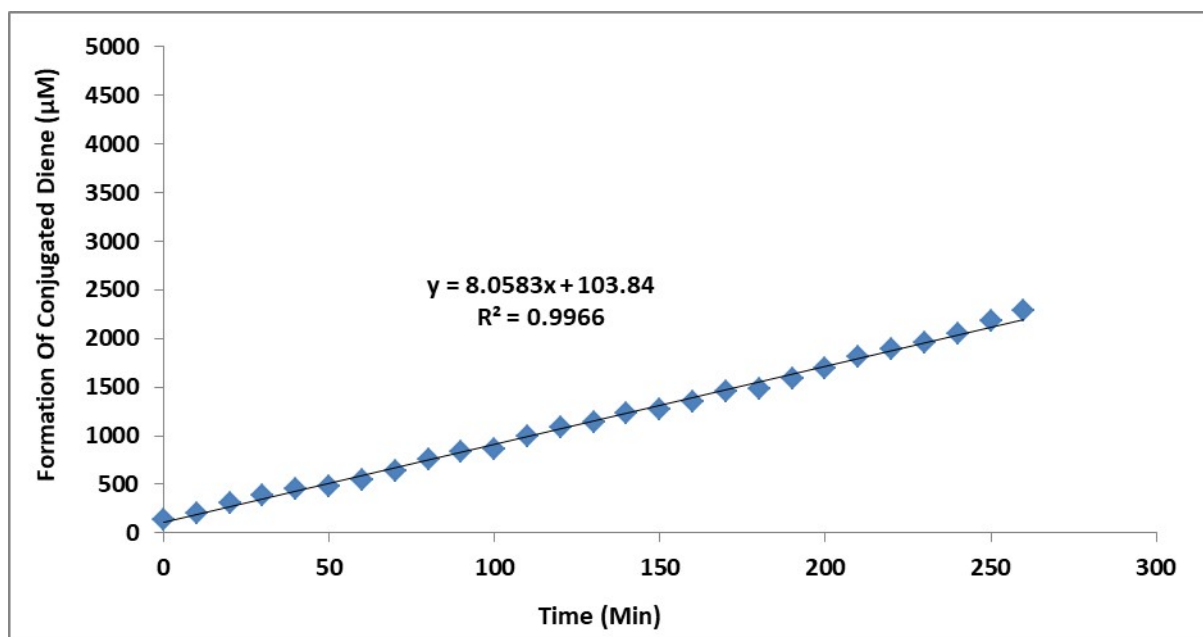

$R_{inh} = 484 \mu\text{M}/\text{min}$

**Figure S20.** Experiment with antioxidant **8** using  $K_4[Fe(CN)_6] \cdot 3H_2O + \text{PTC}$

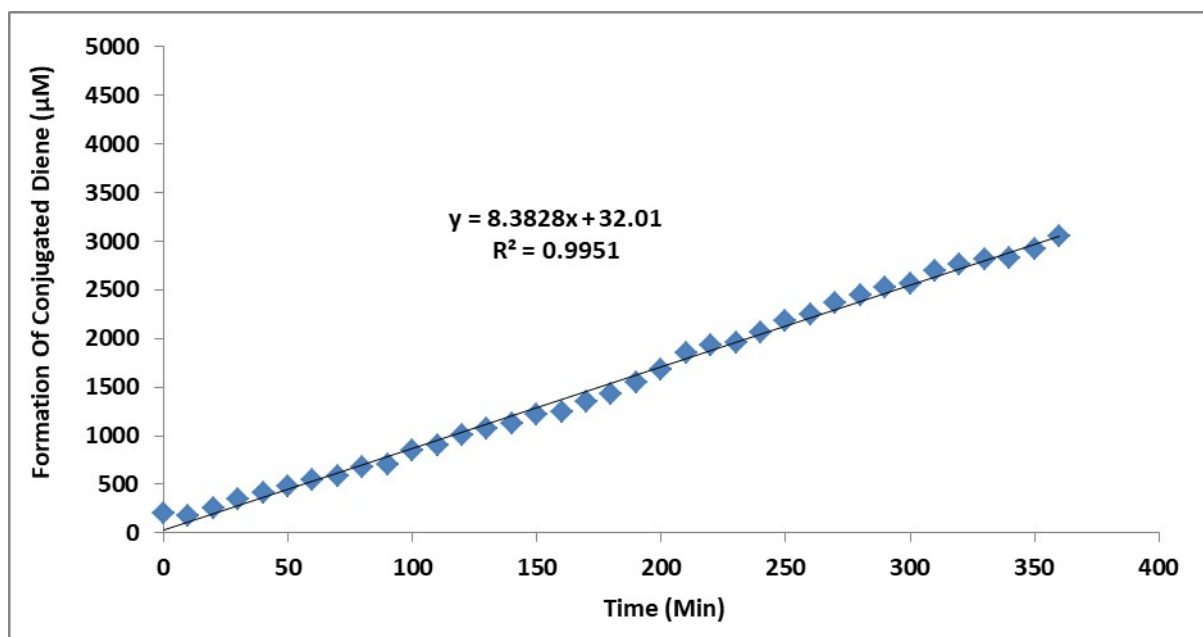

$R_{inh} = 503 \mu\text{M}/\text{min}$

Figure S21. Experiment with antioxidant 8 using PCET

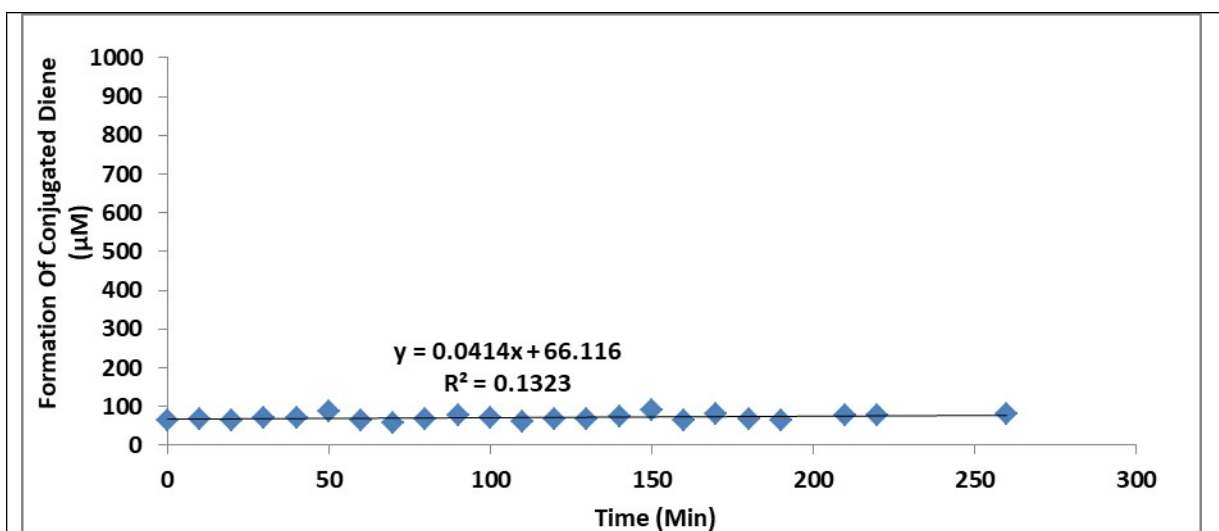

$R_{\text{inh}} = 2.46 \mu\text{M}/\text{min}$   $T_{\text{inh}} > 360 \text{ Min}$

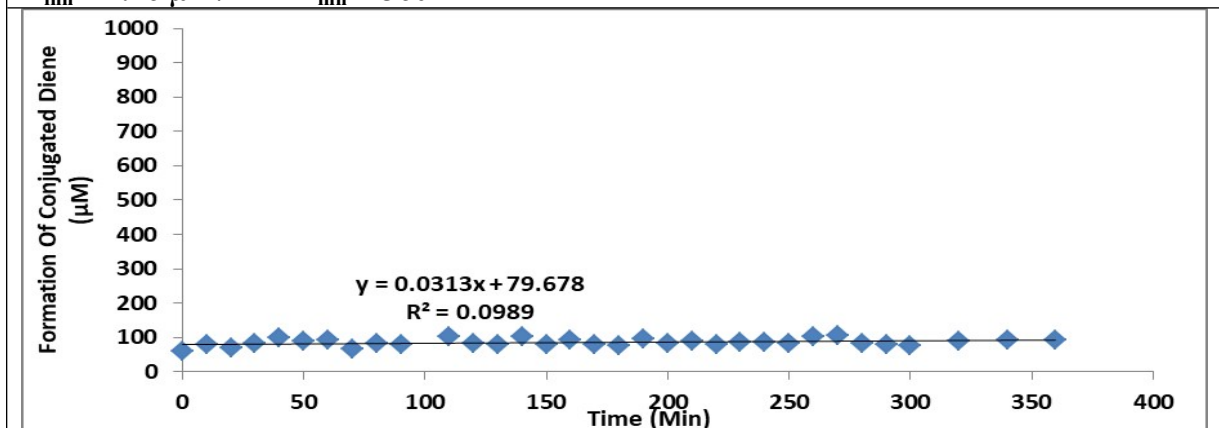

$R_{\text{inh}} = 1.88 \mu\text{M}/\text{min}$   $T_{\text{inh}} > 360 \text{ Min}$

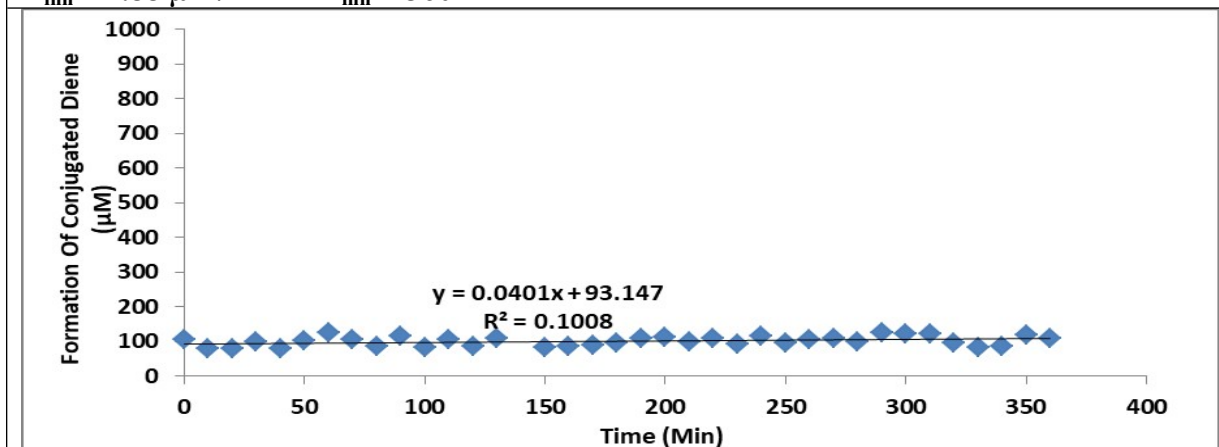

$R_{\text{inh}} = 2.4 \mu\text{M}/\text{min}$   $T_{\text{inh}} > 360 \text{ Min}$

**Figure S22.** Experiment with antioxidant **8** using NAC pH = 1

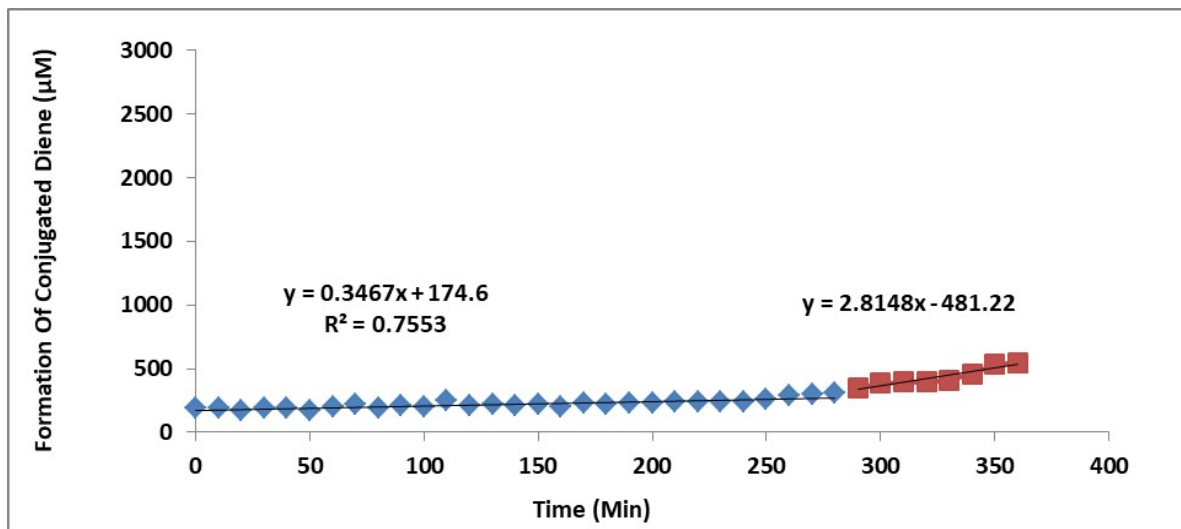

$R_{\text{inh}} = 20.8 \mu\text{M}/\text{Min}$      $T_{\text{inh}} = 266 \text{ Min}$

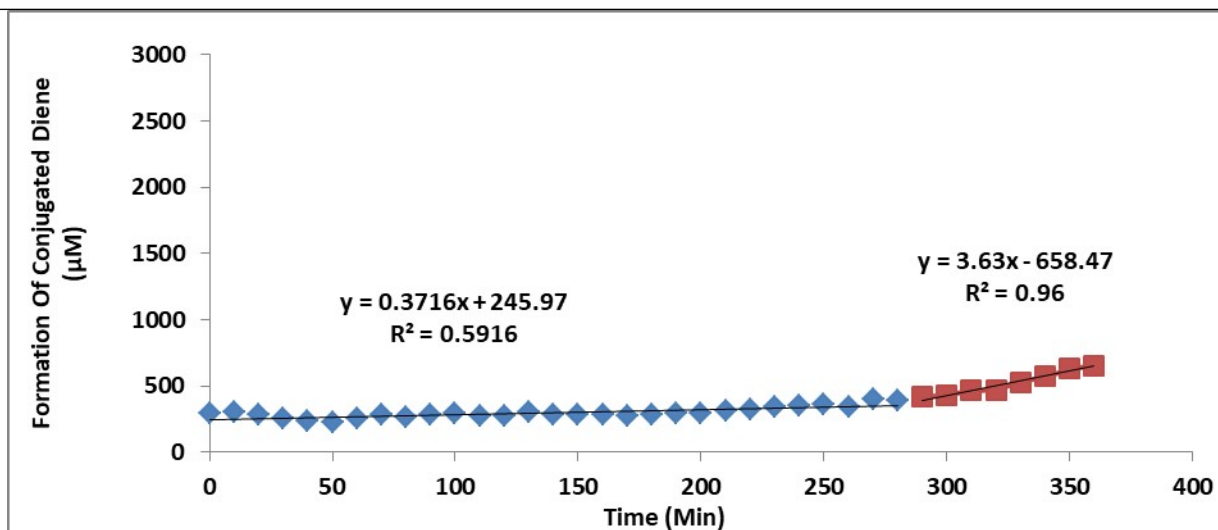

$R_{\text{inh}} = 22.26 \mu\text{M}/\text{Min}$      $T_{\text{inh}} = 278 \text{ Min}$

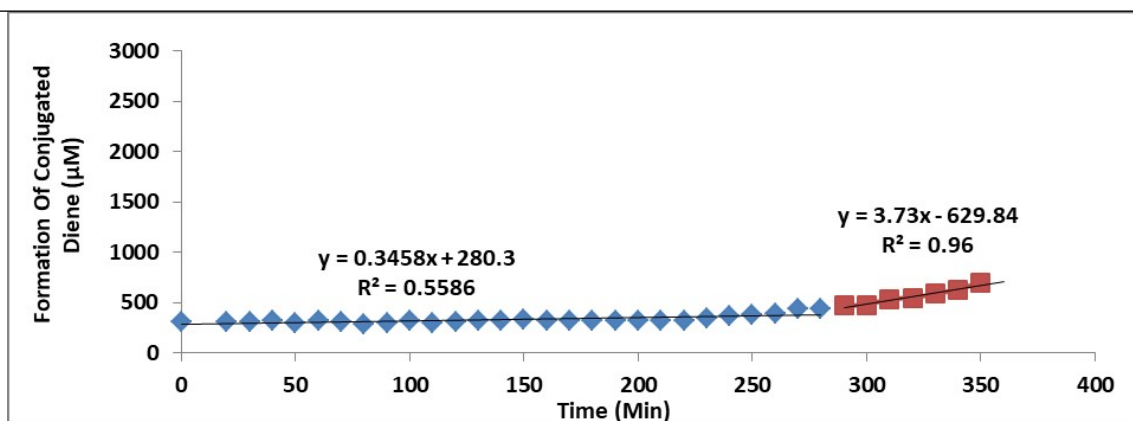

$R_{\text{inh}} = 20.7 \mu\text{M}/\text{Min}$      $T_{\text{inh}} = 269 \text{ Min}$

**Figure S23.** Experiment with antioxidant **8** using NAC pH = 2

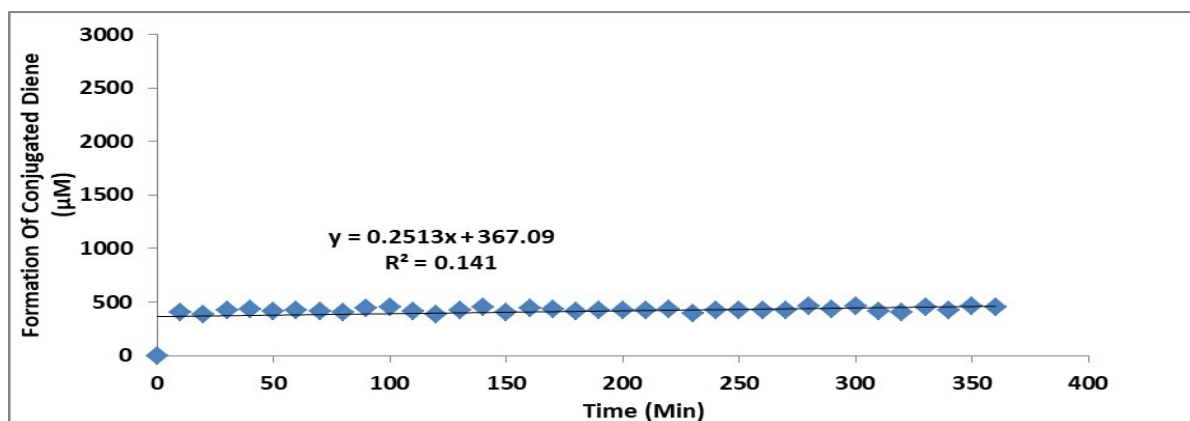

$R_{\text{inh}} = 5.06 \mu\text{M}/\text{Min}$      $T_{\text{inh}} > 360 \text{ Min}$

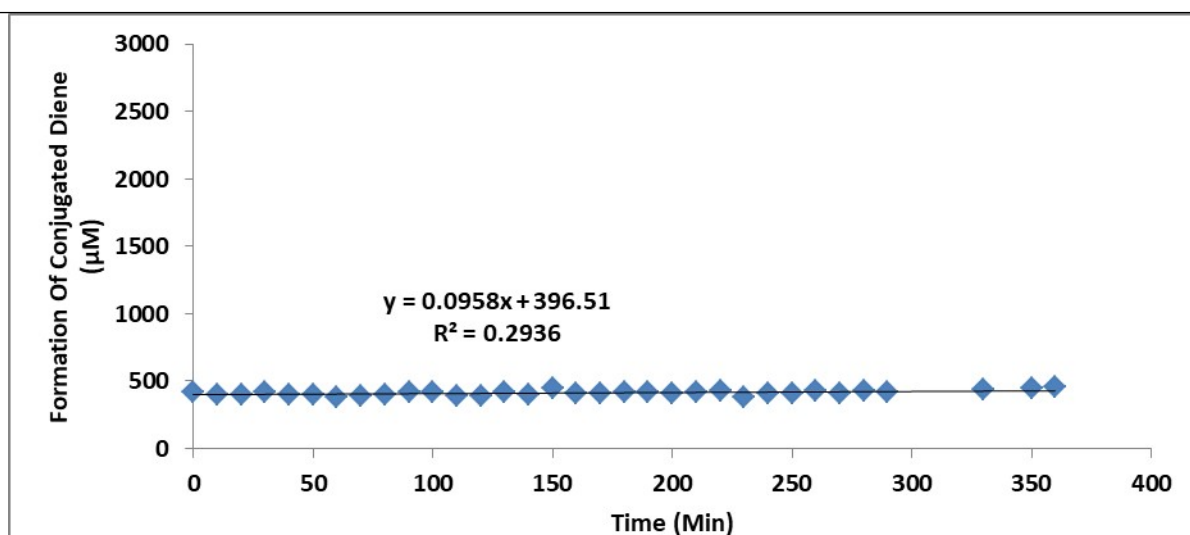

$R_{\text{inh}} = 5.7 \mu\text{M}/\text{Min}$      $T_{\text{inh}} > 360 \text{ Min}$

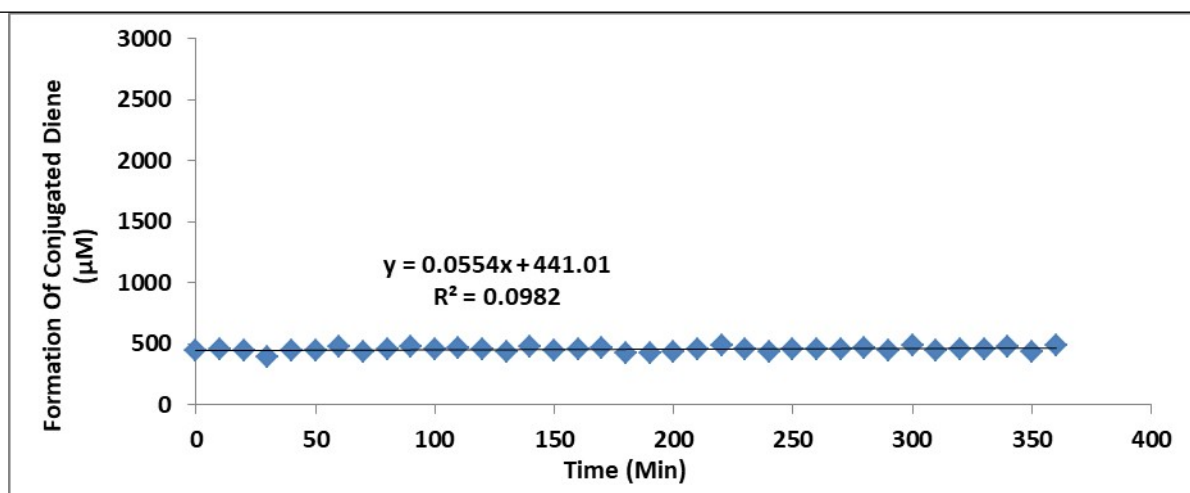

$R_{\text{inh}} = 3.3 \mu\text{M}/\text{Min}$      $T_{\text{inh}} > 360 \text{ Min}$



**Figure S24.** Experiment with antioxidant **8** using NAC pH = 3

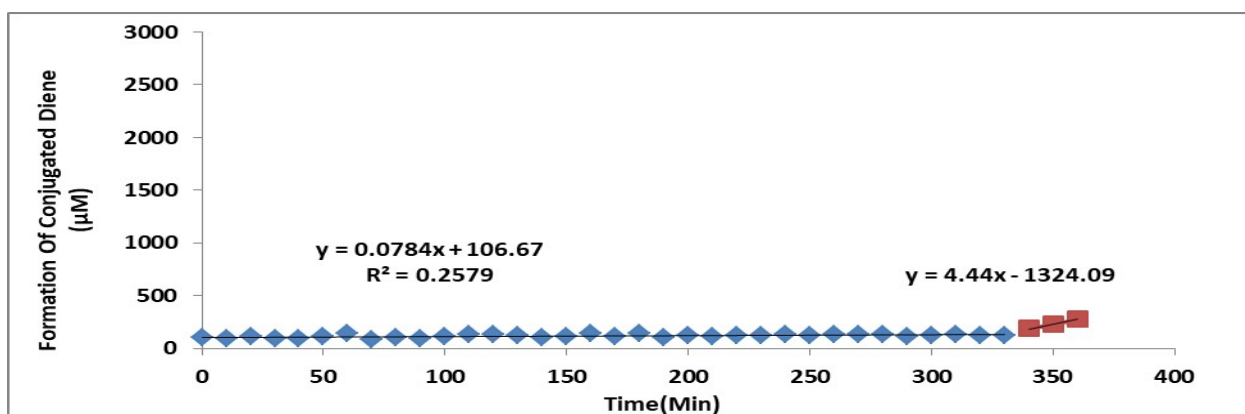

$R_{inh} = 4.7 \mu\text{M}/\text{Min}$     $T_{inh} = 328 \text{ Min}$

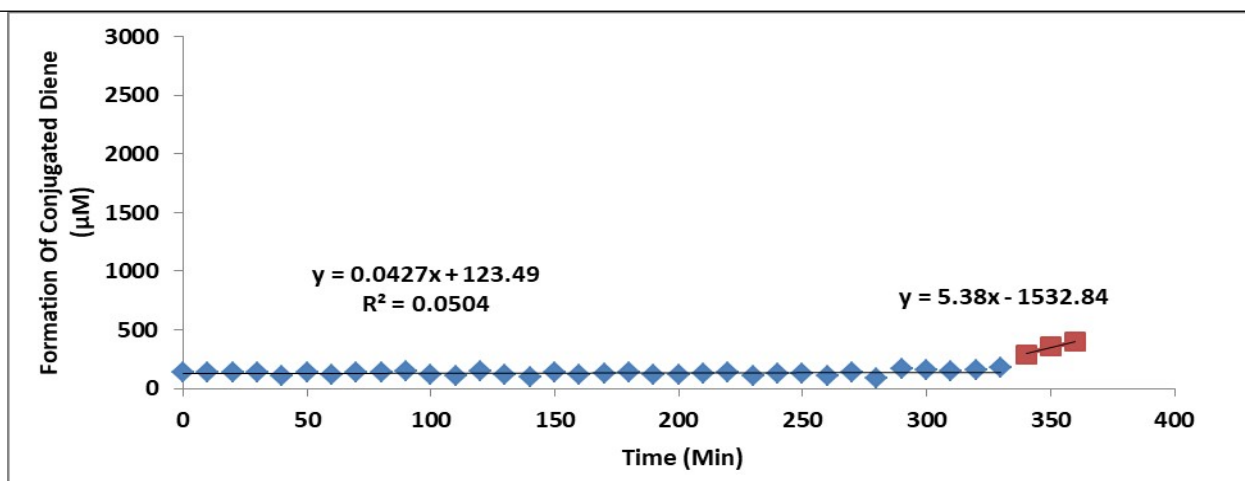

$R_{inh} = 2.52 \mu\text{M}/\text{Min}$     $T_{inh} = 311 \text{ Min}$

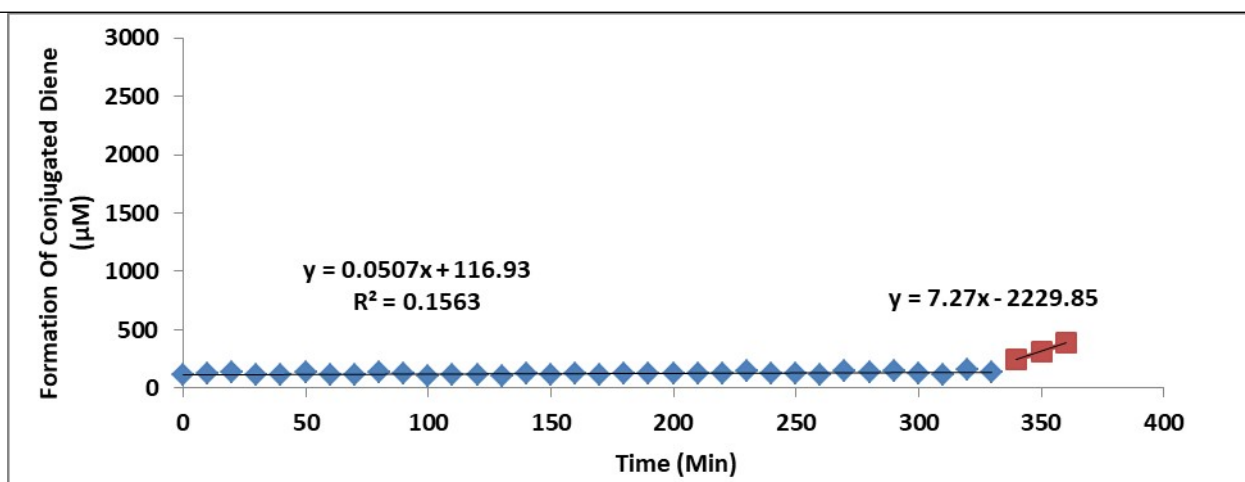

$R_{inh} = 3.0 \mu\text{M}/\text{Min}$     $T_{inh} = 325 \text{ Min}$

**Figure S25.** Experiment with antioxidant **8** using NAC pH = 4

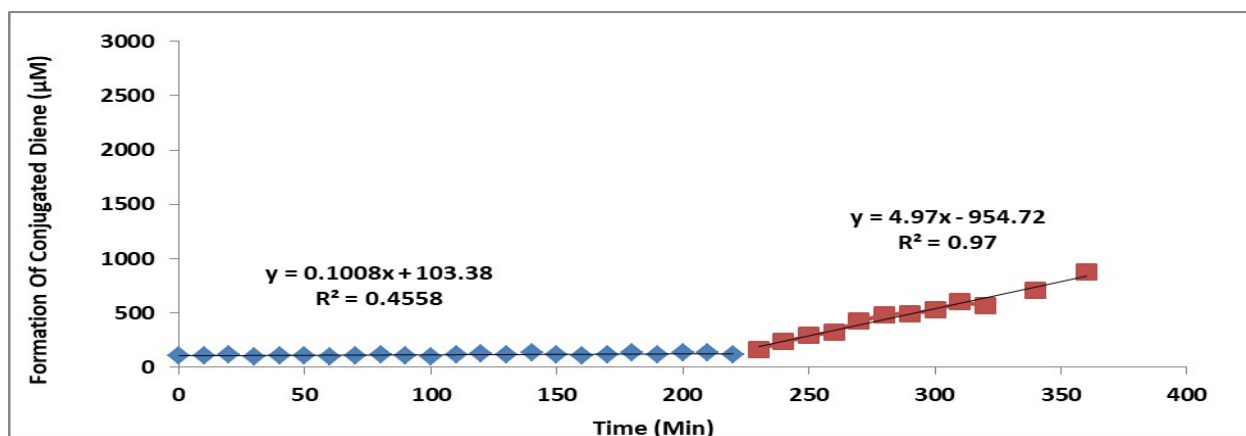

$R_{\text{inh}} = 6.05 \mu\text{M}/\text{Min}$     $T_{\text{inh}} = 220 \text{ Min}$

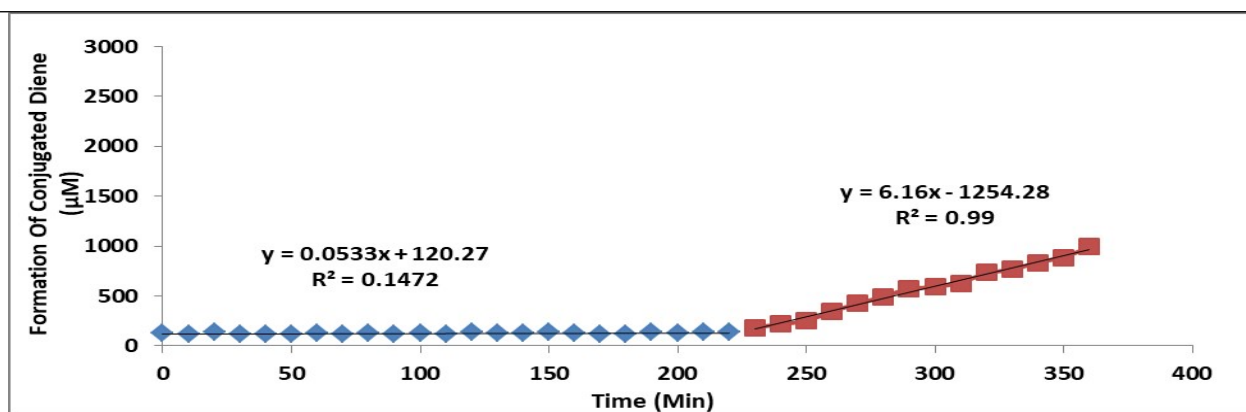

$R_{\text{inh}} = 3.18 \mu\text{M}/\text{Min}$     $T_{\text{inh}} = 225 \text{ Min}$

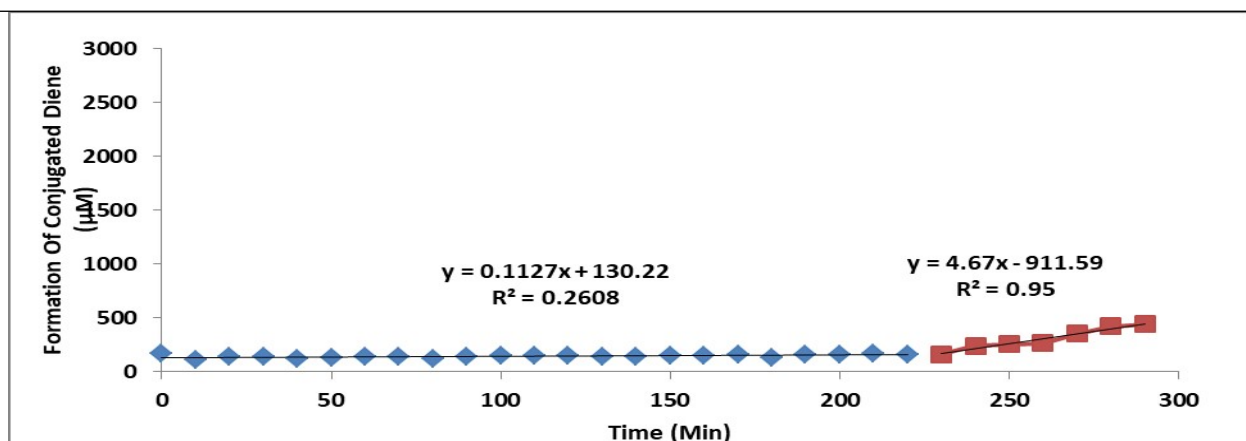

$R_{\text{inh}} = 6.72 \mu\text{M}/\text{Min}$     $T_{\text{inh}} = 228 \text{ Min}$

**Figure S26.** Experiment with antioxidant **8** using NAC pH = 5

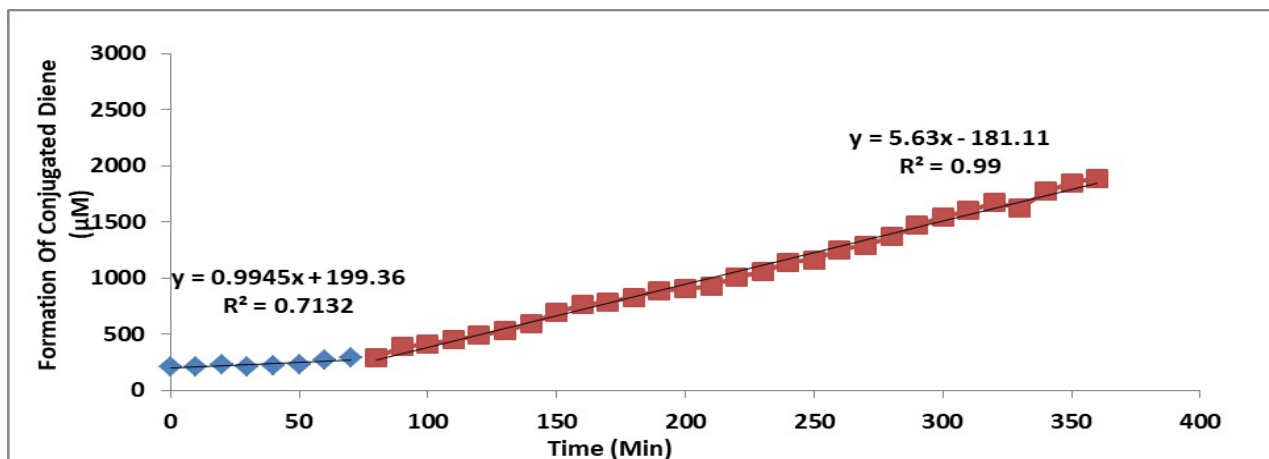

$R_{\text{inh}} = 59.64 \mu\text{M}/\text{Min}$     $T_{\text{inh}} = 75 \text{ Min}$

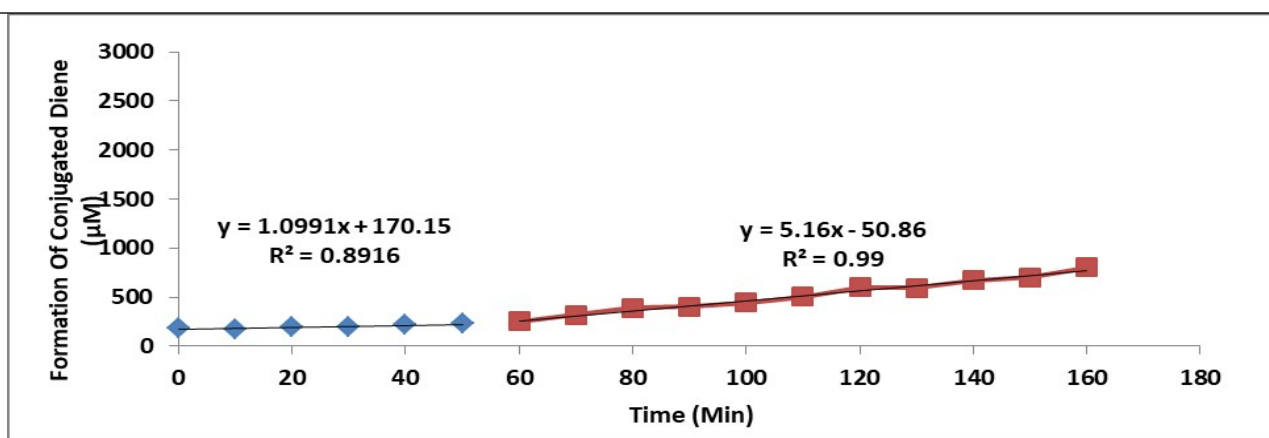

$R_{\text{inh}} = 65.94 \mu\text{M}/\text{Min}$     $T_{\text{inh}} = 55 \text{ Min}$

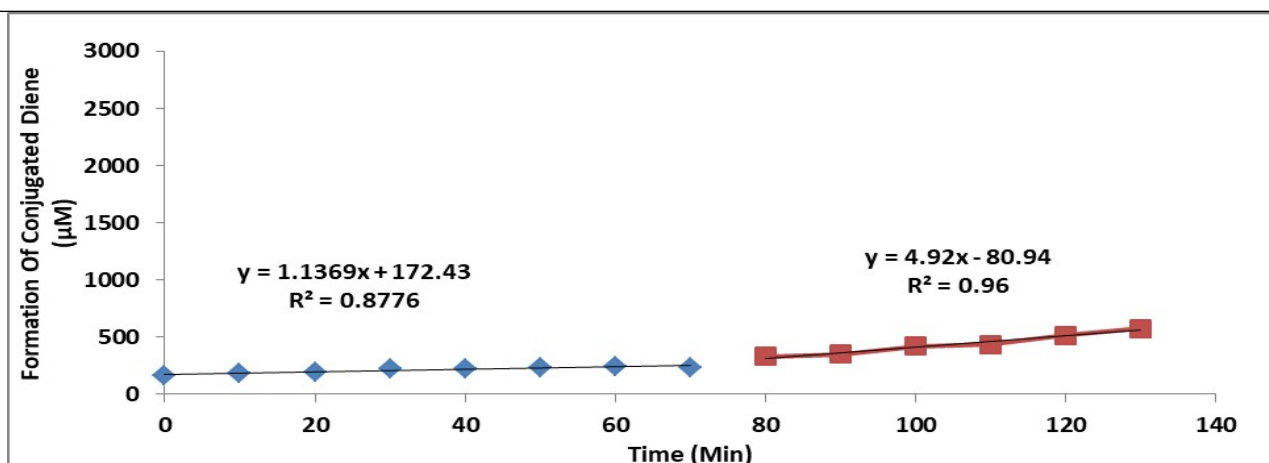

$R_{\text{inh}} = 68.2 \mu\text{M}/\text{Min}$     $T_{\text{inh}} = 67 \text{ Min}$

**Figure S27.** Experiment with antioxidant **8** using NAC pH = 6

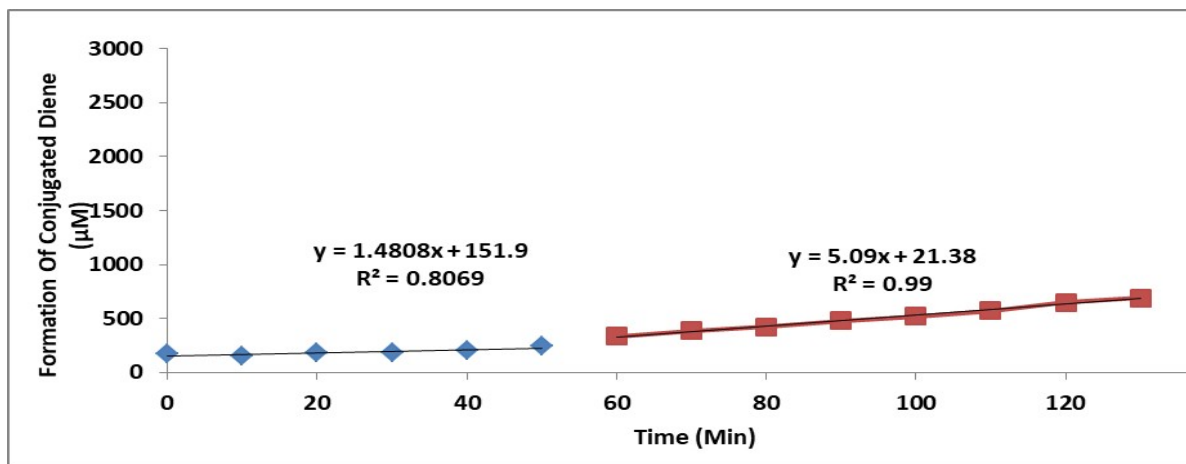

$R_{inh} = 88.8 \mu\text{M}/\text{Min}$     $T_{inh} = 48 \text{ Min}$

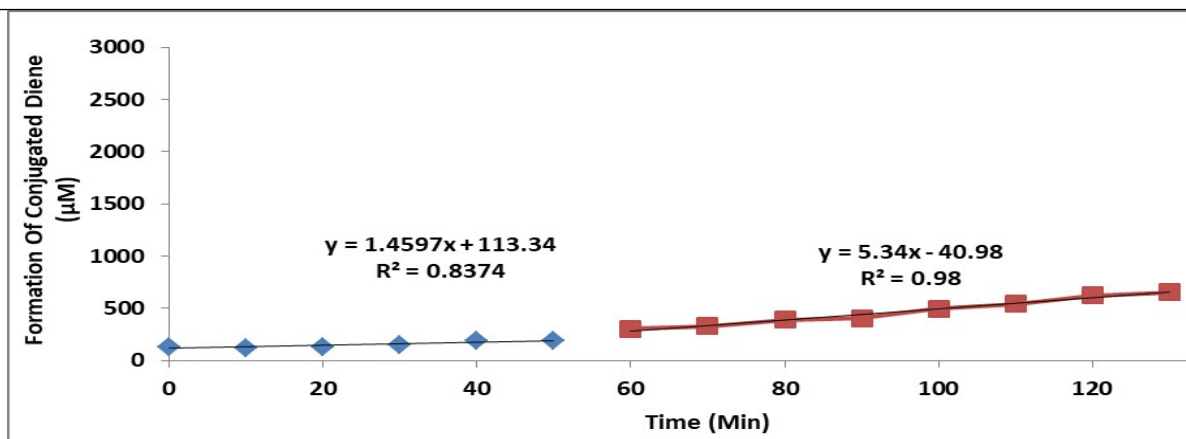

$R_{inh} = 87.6 \mu\text{M}/\text{Min}$     $T_{inh} = 55 \text{ Min}$

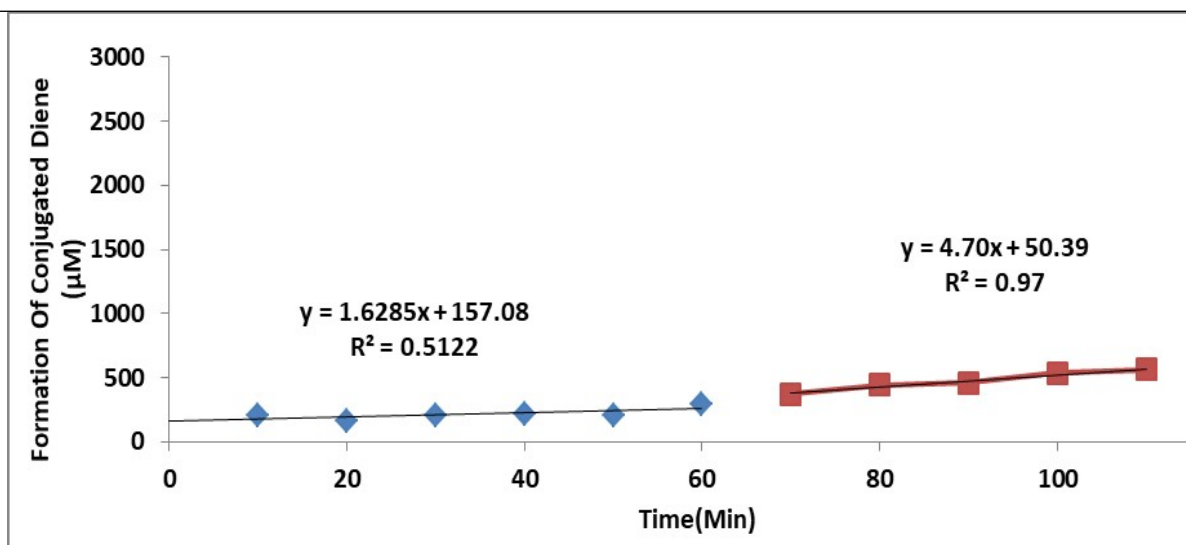

$R_{inh} = 97.7 \mu\text{M}/\text{Min}$     $T_{inh} = 60 \text{ Min}$

**Figure S28.** Experiment with antioxidant **8** using NAC pH = 7

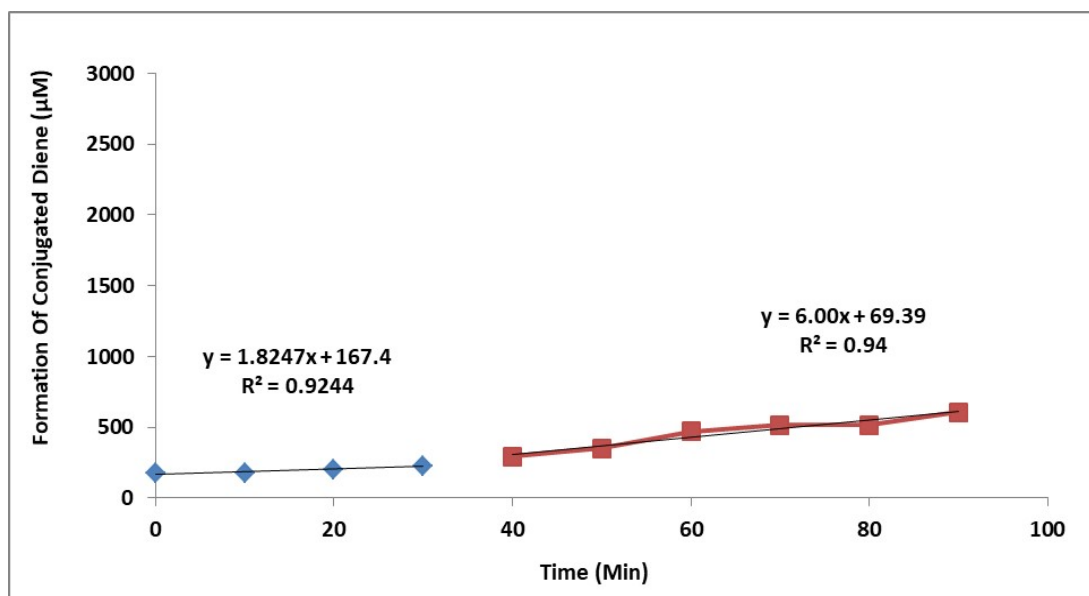

$R_{\text{inh}} = 109.5 \mu\text{M}/\text{Min}$     $T_{\text{inh}} = 57 \text{ Min}$

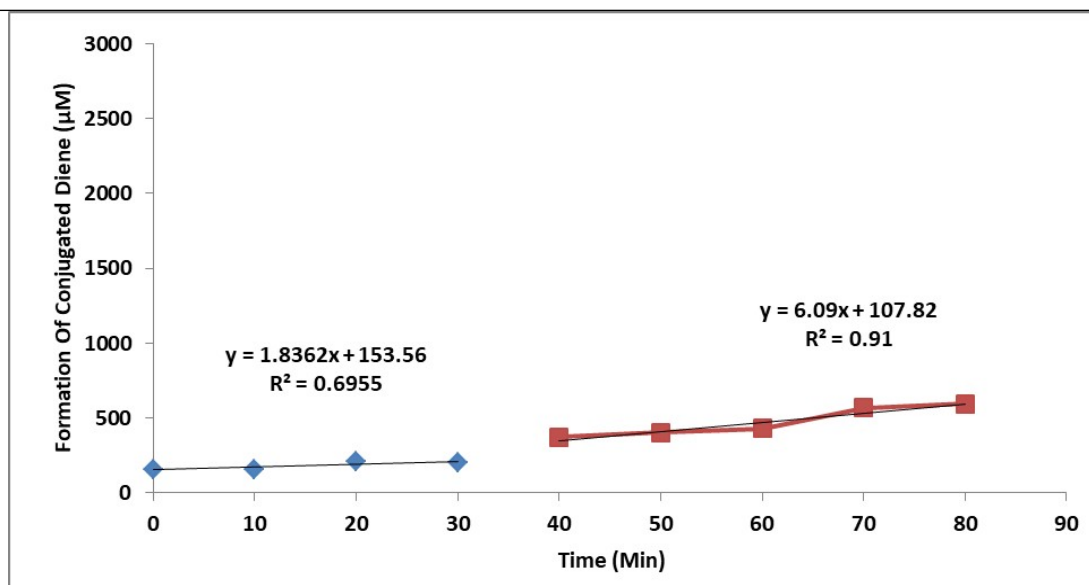

$R_{\text{inh}} = 110.2 \mu\text{M}/\text{Min}$     $T_{\text{inh}} = 61 \text{ Min}$

Figure S29. Experiment with antioxidant 9 using Ascorbic Acid

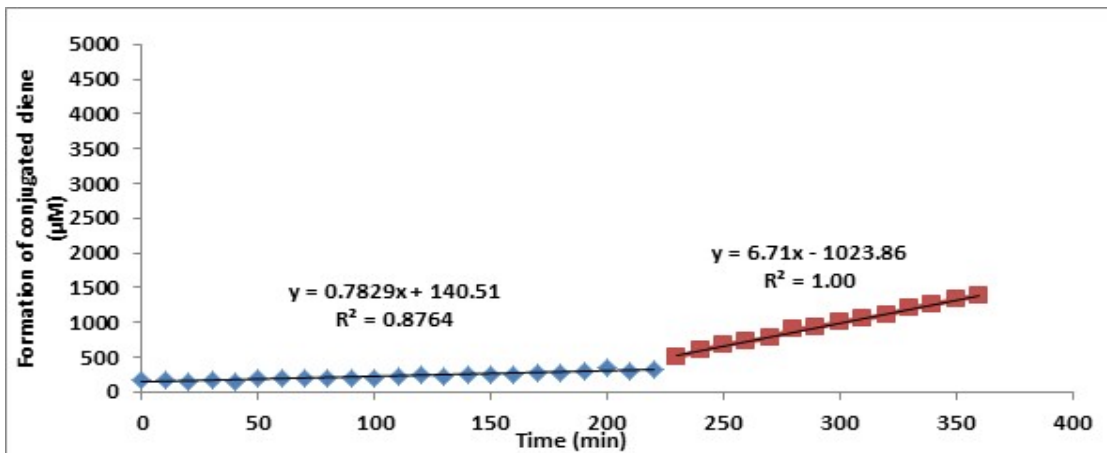

$R_{\text{inh}} = 46.92 \mu\text{M}/\text{min}$      $T_{\text{inh}} = 210 \text{ Min}$

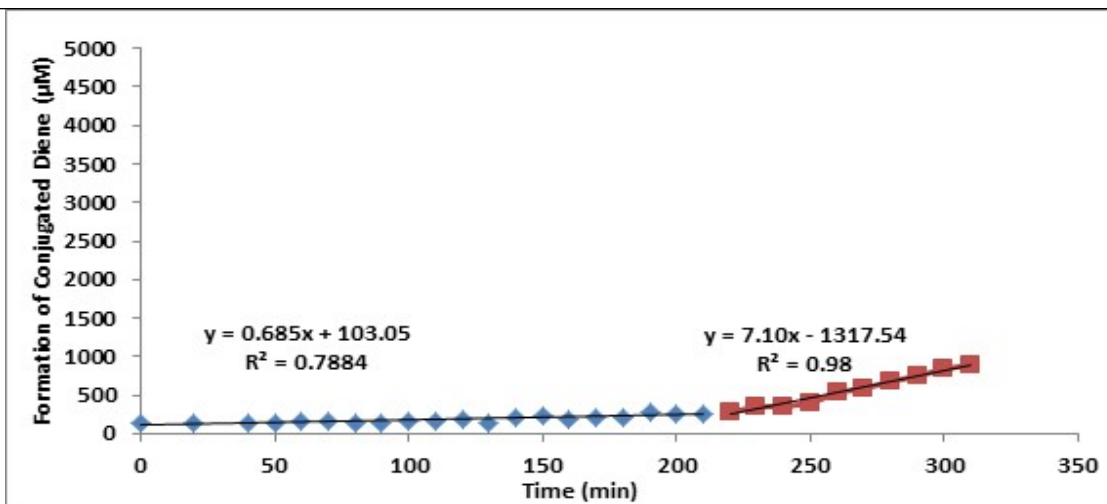

$R_{\text{inh}} = 41.4 \mu\text{M}/\text{min}$      $T_{\text{inh}} = 208 \text{ Min}$

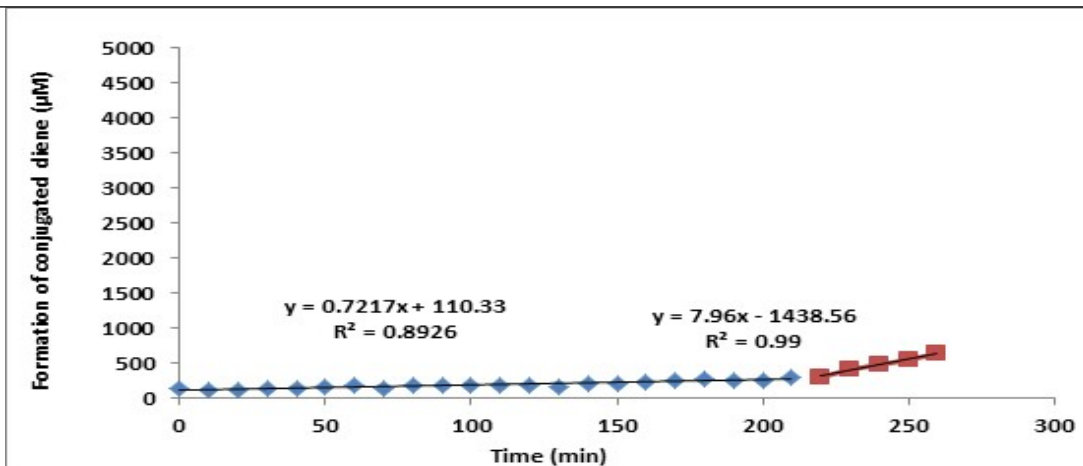

$R_{\text{inh}} = 43.3 \mu\text{M}/\text{min}$      $T_{\text{inh}} = 212 \text{ Min}$

Figure S30. Experiment with antioxidant 9 using DTT

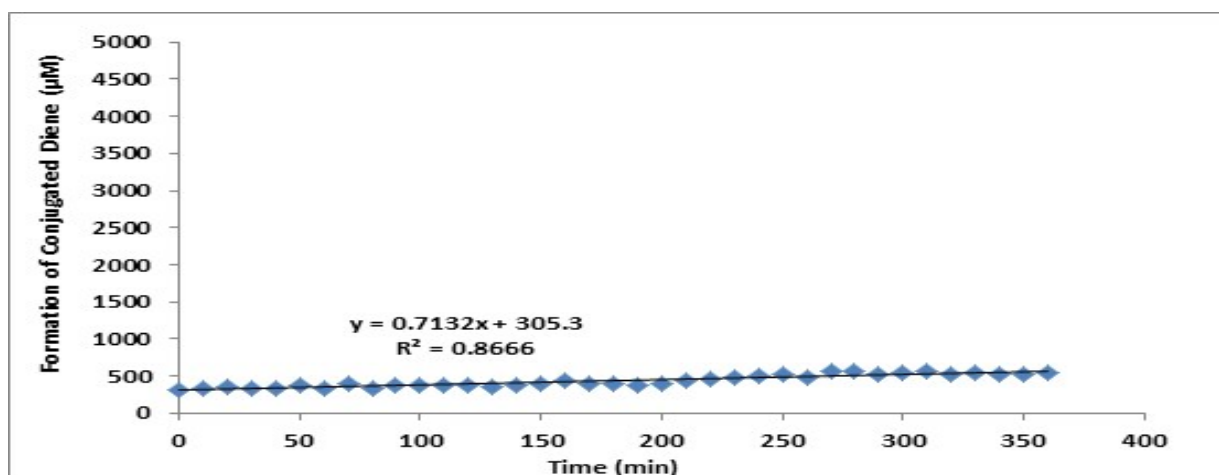

$R_{\text{inh}} = 42.8 \mu\text{M}/\text{min}$      $T_{\text{inh}} > 360 \text{ Min}$

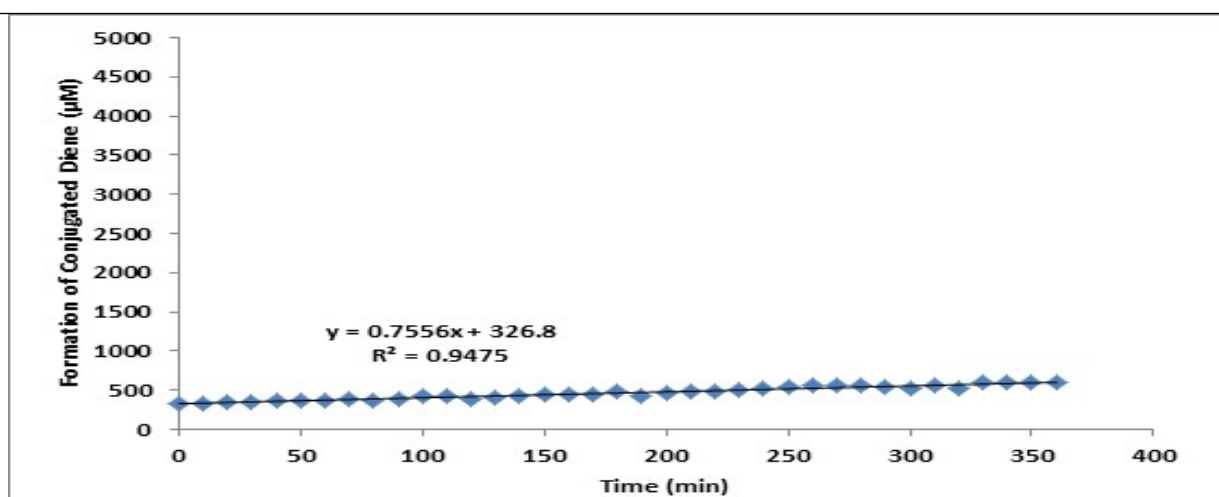

$R_{\text{inh}} = 45.3 \mu\text{M}/\text{min}$      $T_{\text{inh}} > 360 \text{ Min}$

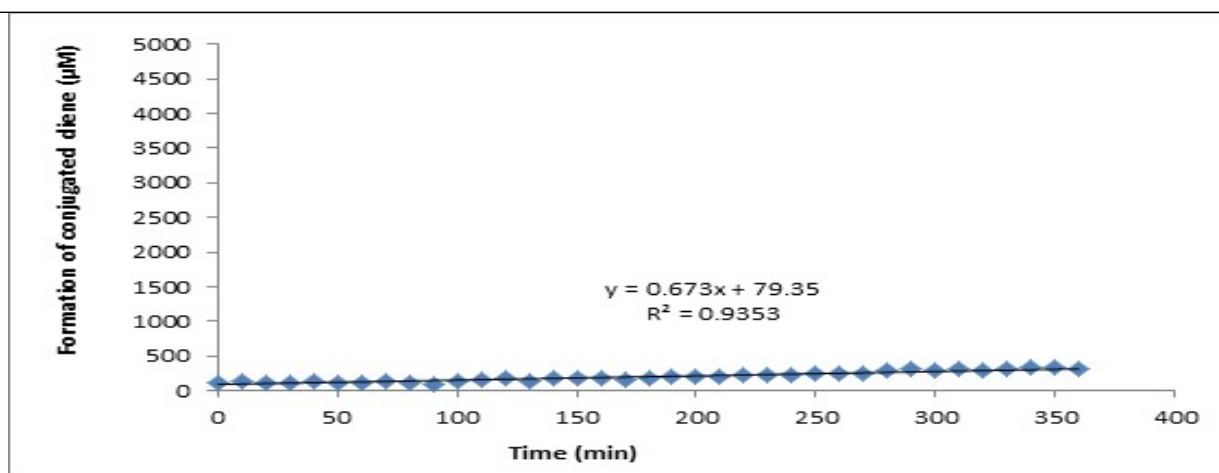

$R_{\text{inh}} = 40.4 \mu\text{M}/\text{min}$      $T_{\text{inh}} > 360 \text{ Min}$

Figure S31. Experiment with antioxidant 9 using NAC

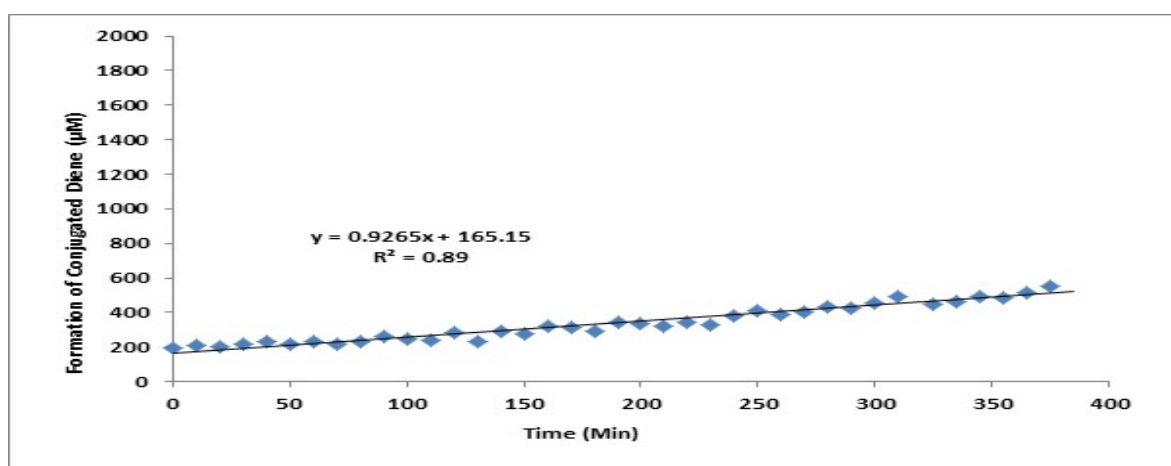

$R_{\text{inh}} = 55.56 \mu\text{M}/\text{min}$      $T_{\text{inh}} > 360 \text{ Min}$

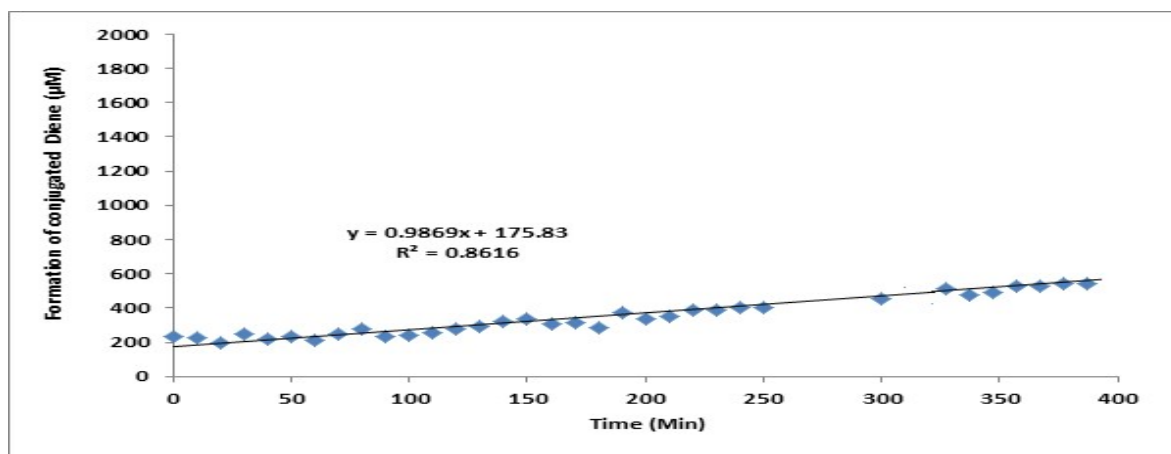

$R_{\text{inh}} = 59.16 \mu\text{M}/\text{min}$      $T_{\text{inh}} > 360 \text{ Min}$

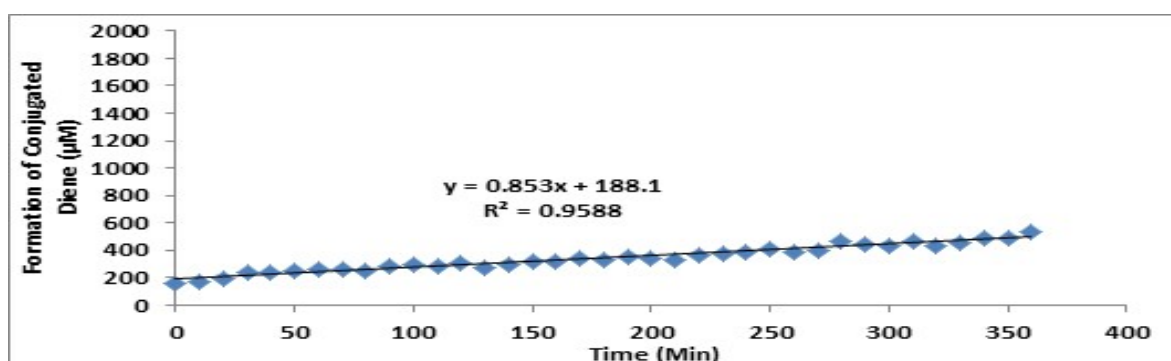

$R_{\text{inh}} = 51.2 \mu\text{M}/\text{min}$      $T_{\text{inh}} > 360 \text{ Min}$



Figure S32. Experiment with antioxidant **9** using  $K_4Fe(CN_6) \cdot 4H_2O$

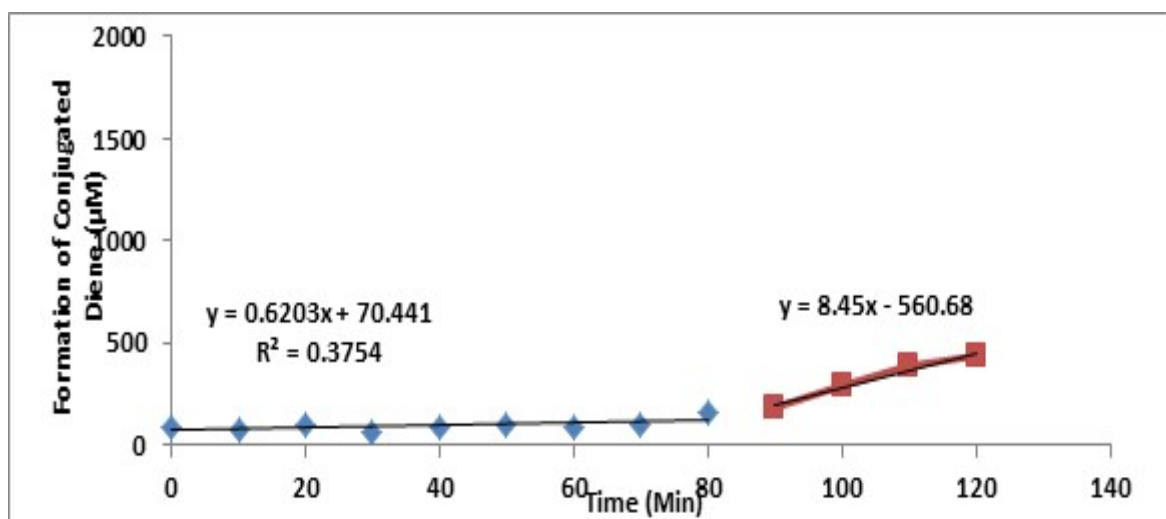

$R_{inh} = 37.2 \mu\text{M}/\text{min}$      $T_{inh} = 80.602 \text{ Min}$

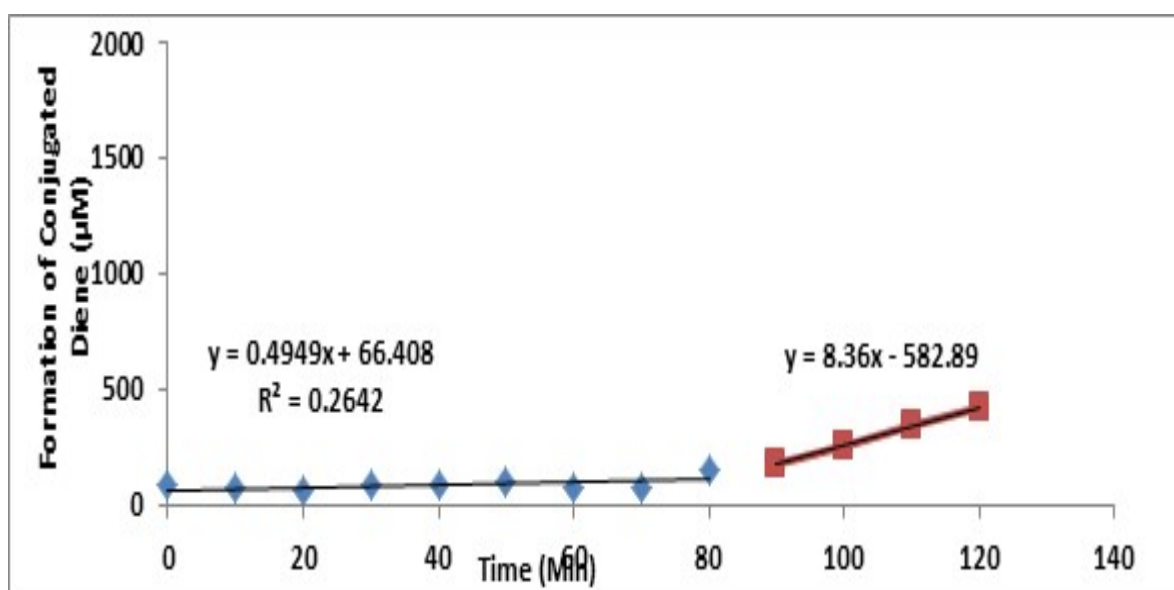

$R_{inh} = 29.64 \mu\text{M}/\text{min}$      $T_{inh} = 82.54 \text{ Min}$

Figure S33. Experiment with antioxidant 9 using PTCP

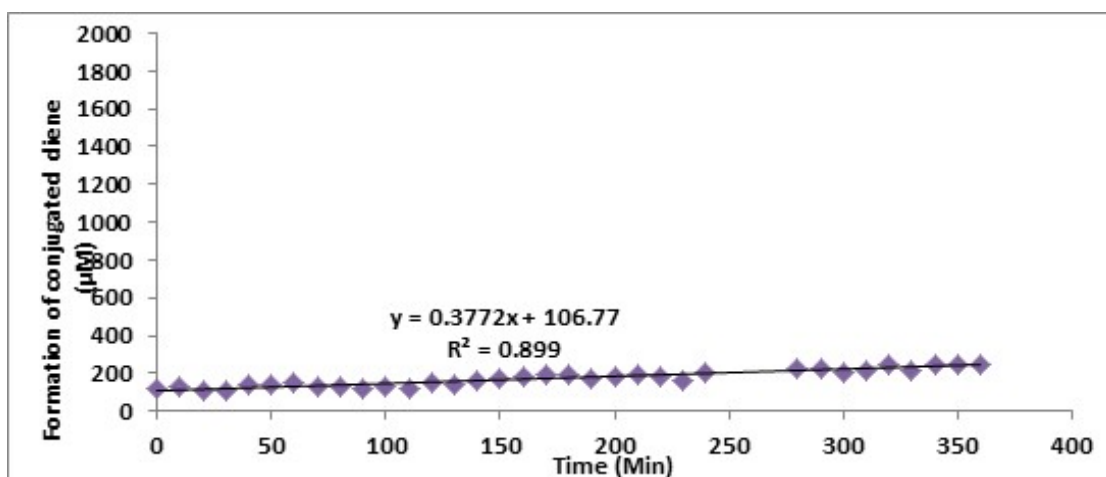

$R_{inh} = 22.62 \mu\text{M}/\text{min}$      $T_{inh} > 360 \text{ Min}$

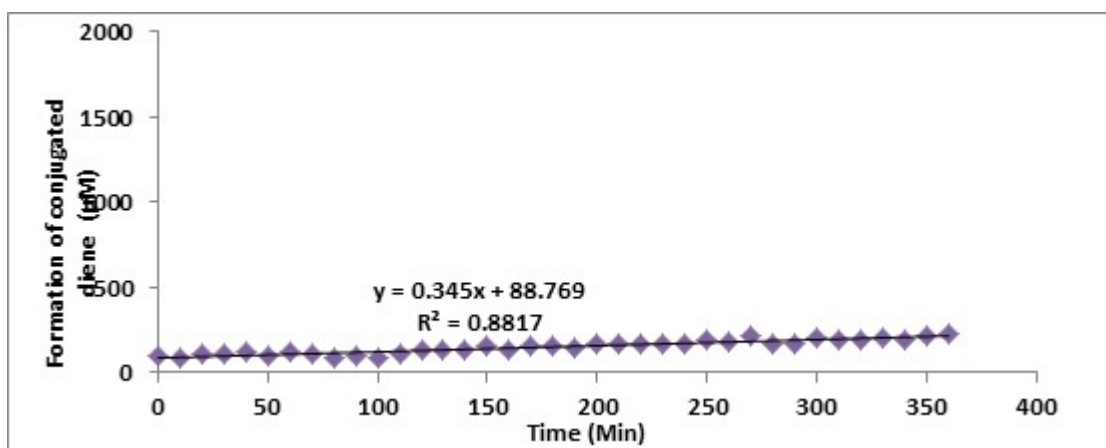

$R_{inh} = 20.7 \mu\text{M}/\text{min}$      $T_{inh} > 360 \text{ Min}$

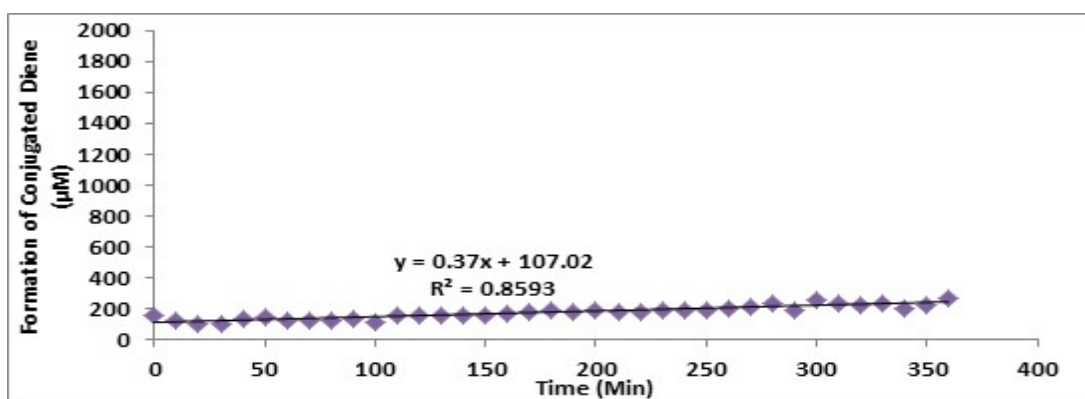

$R_{inh} = 22.2 \mu\text{M}/\text{min}$      $T_{inh} > 360 \text{ Min}$

Figure S34. Experiment with antioxidant 9 using Sodium Ascorbate

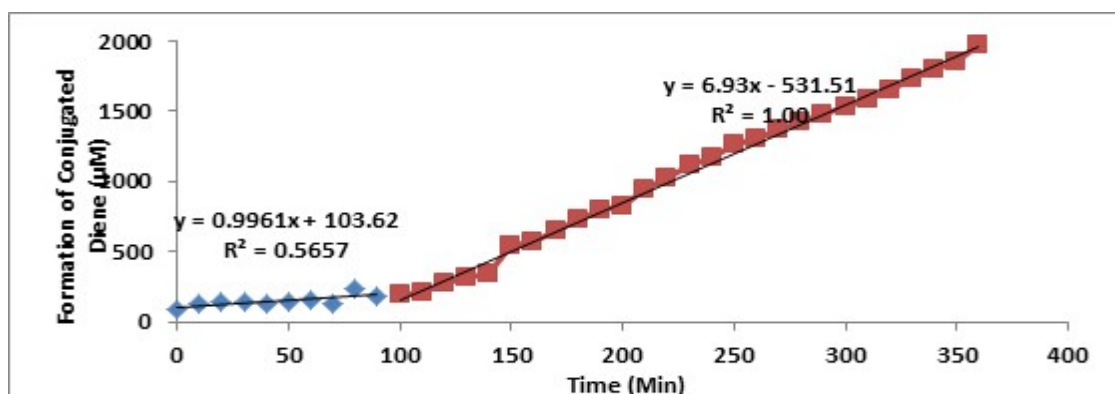

$R_{\text{inh}} = 59.76 \mu\text{M}/\text{min}$       $T_{\text{inh}} = 106.4 \text{ Min}$

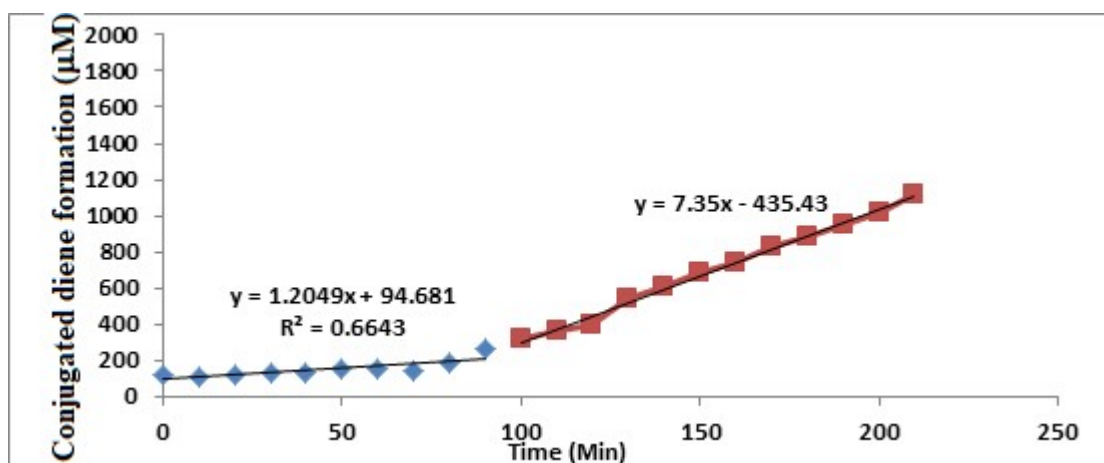

$R_{\text{inh}} = 72.24 \mu\text{M}/\text{min}$       $T_{\text{inh}} = 86.2 \text{ Min}$

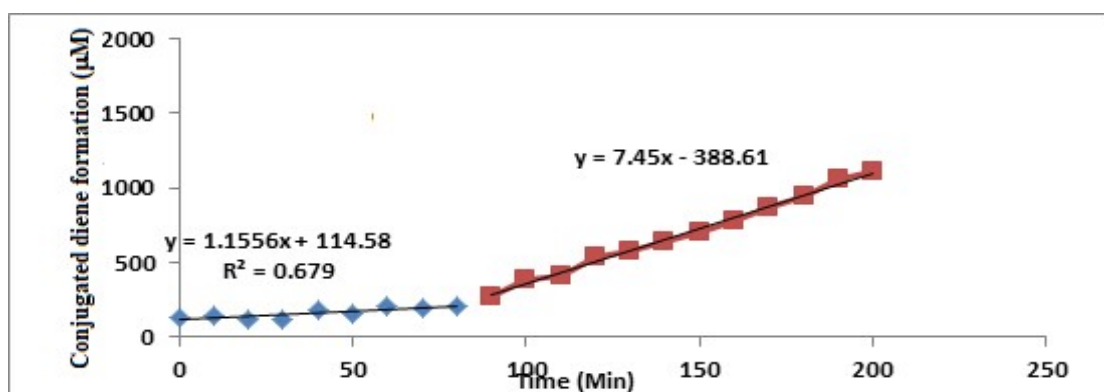

$R_{\text{inh}} = 69.3 \mu\text{M}/\text{min}$       $T_{\text{inh}} = 85.34 \text{ Min}$

**Figure S35.** Experiment with antioxidant **9** using  $K_4[Fe(CN)_6] \cdot 3H_2O + PTC$

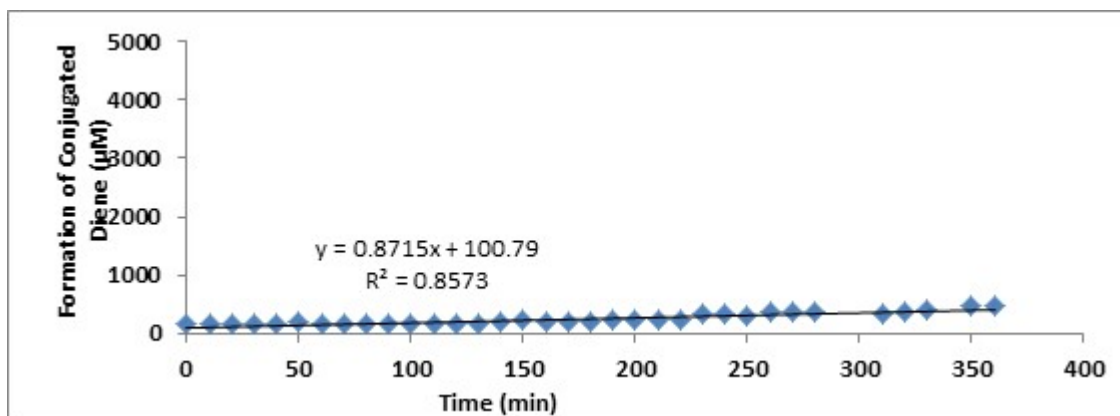

$R_{inh} = 52.26 \mu\text{M}/\text{min}$      $T_{inh} > 360 \text{ Min}$

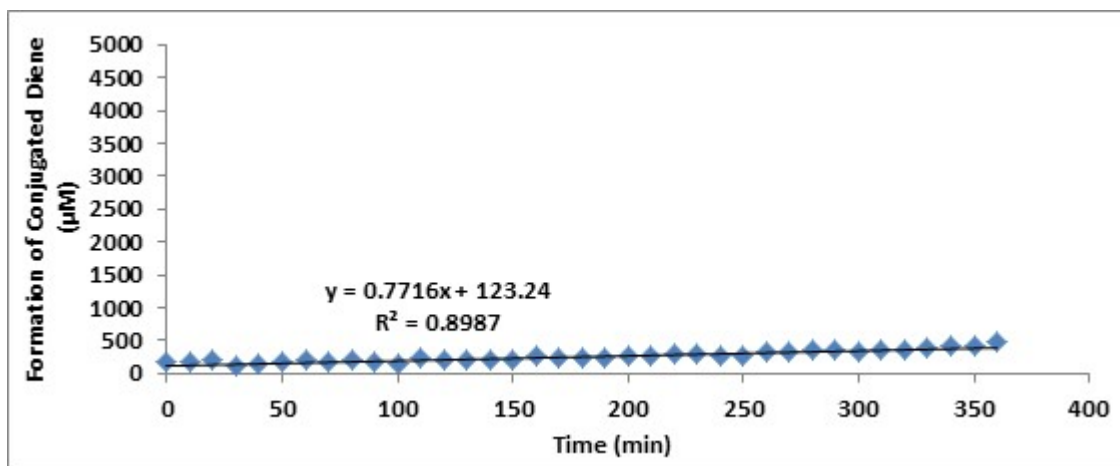

$R_{inh} = 46.26 \mu\text{M}/\text{min}$      $T_{inh} > 360 \text{ Min}$

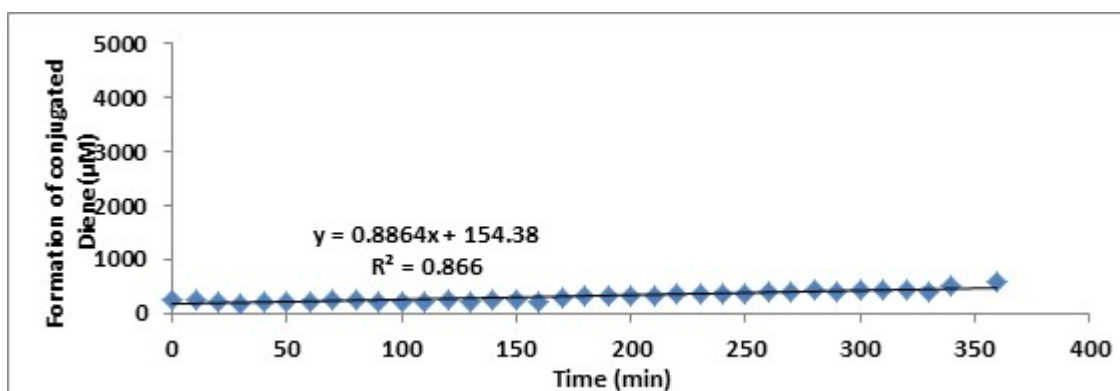

$R_{inh} = 53.16 \mu\text{M}/\text{min}$      $T_{inh} > 360 \text{ Min}$

Figure S36. Experiment with antioxidant 9 using GSH

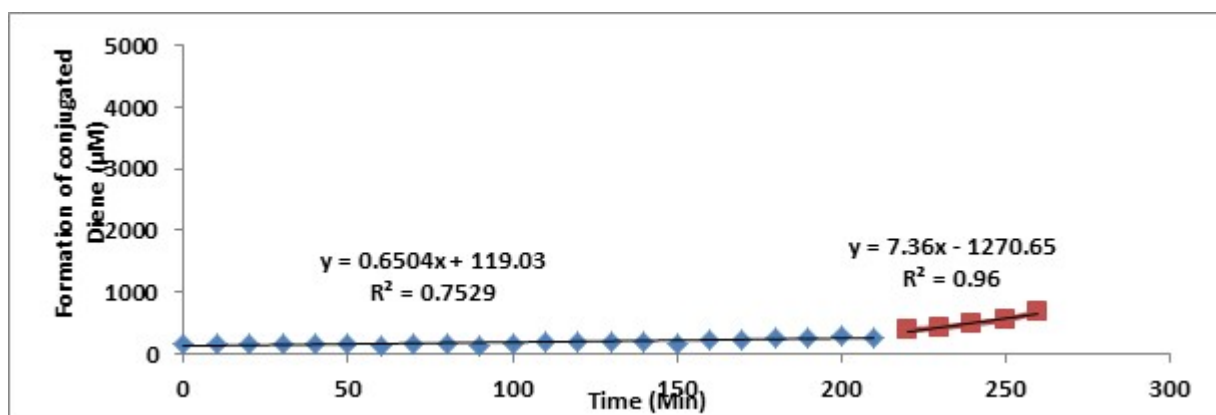

$R_{\text{inh}} = 39 \mu\text{M}/\text{min}$      $T_{\text{inh}} = 207.10 \text{ Min}$

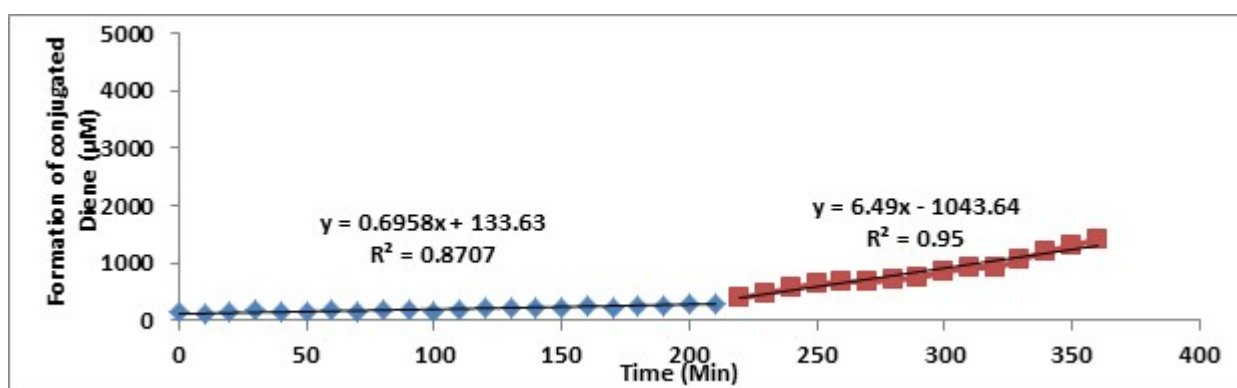

$R_{\text{inh}} = 41.7 \mu\text{M}/\text{min}$      $T_{\text{inh}} = 203.14 \text{ Min}$

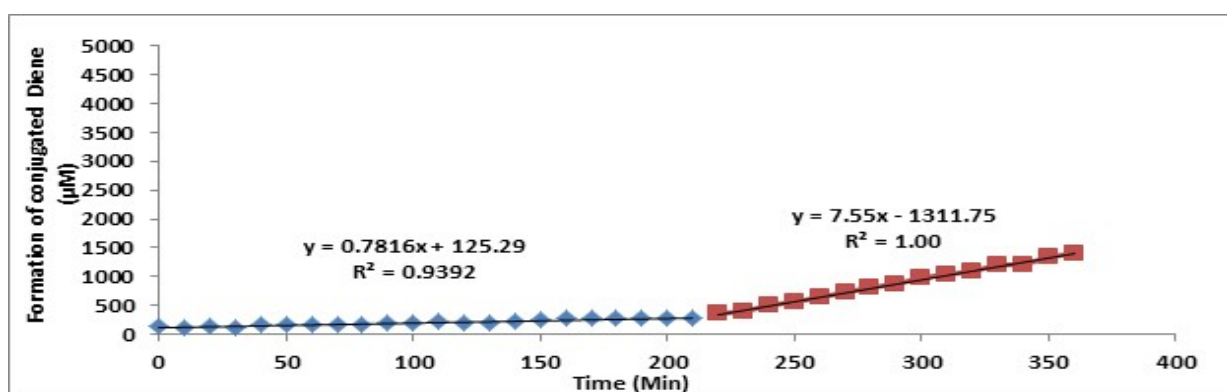

$R_{\text{inh}} = 46.86 \mu\text{M}/\text{min}$      $T_{\text{inh}} = 212.28 \text{ Min}$

**Figure S37.** Experiment with antioxidant **9** using NAC pH 1

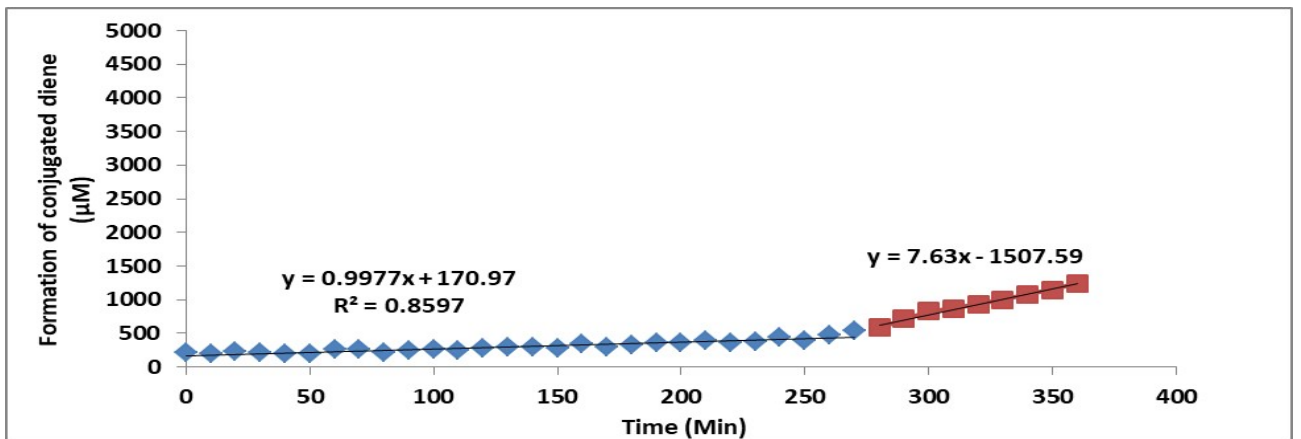

$R_{\text{inh}} = 59.82 \mu\text{M}/\text{Min}$      $T_{\text{inh}} = 253 \text{ Min}$

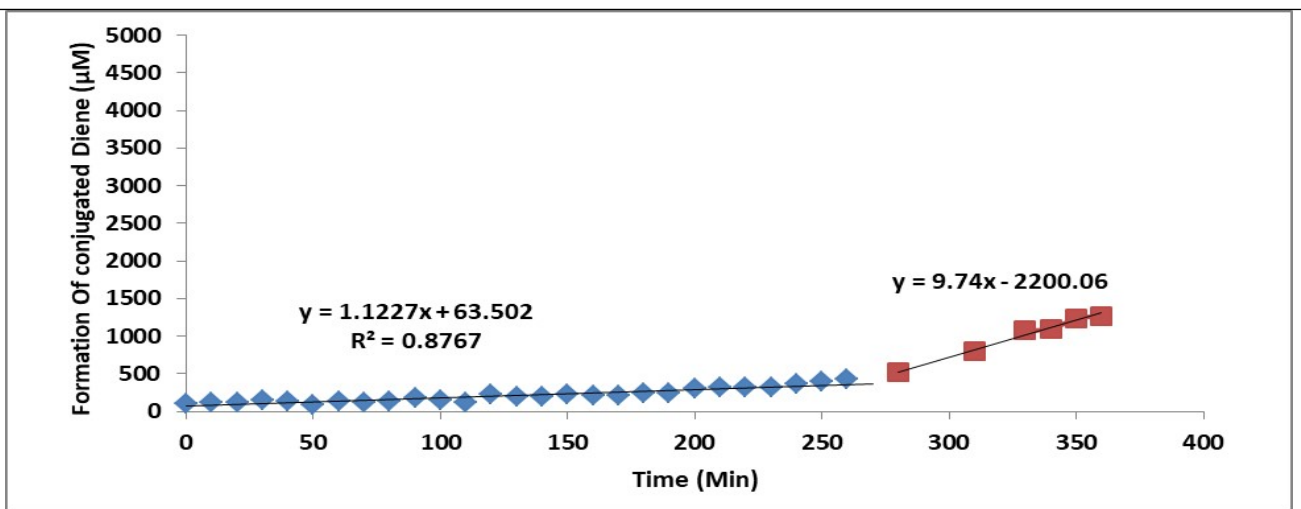

$R_{\text{inh}} = 67.32 \mu\text{M}/\text{Min}$      $T_{\text{inh}} = 263 \text{ Min}$

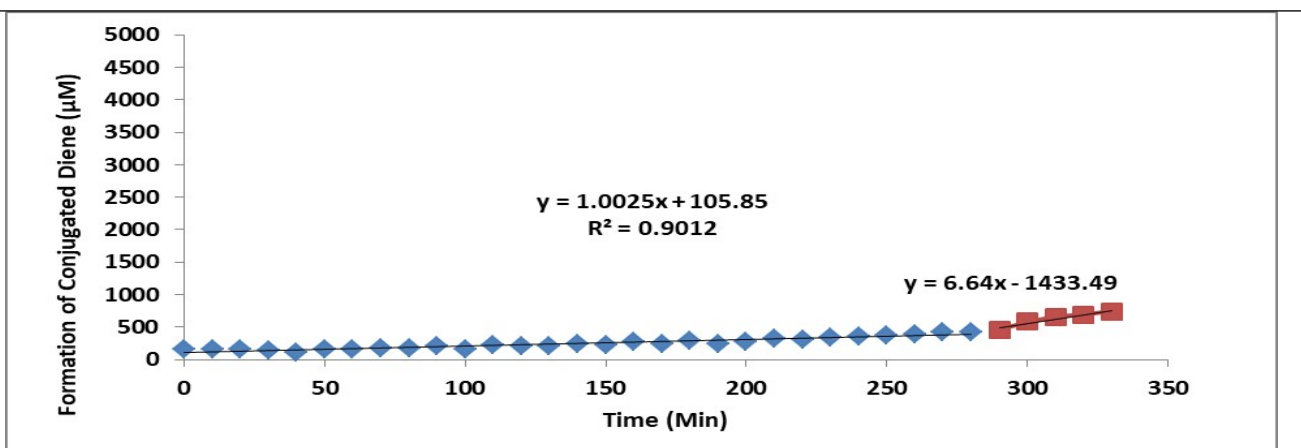

$R_{\text{inh}} = 60.1 \mu\text{M}/\text{Min}$      $T_{\text{inh}} = 273 \text{ Min}$

**Figure S38.** Experiment with antioxidant **9** using NAC pH 2

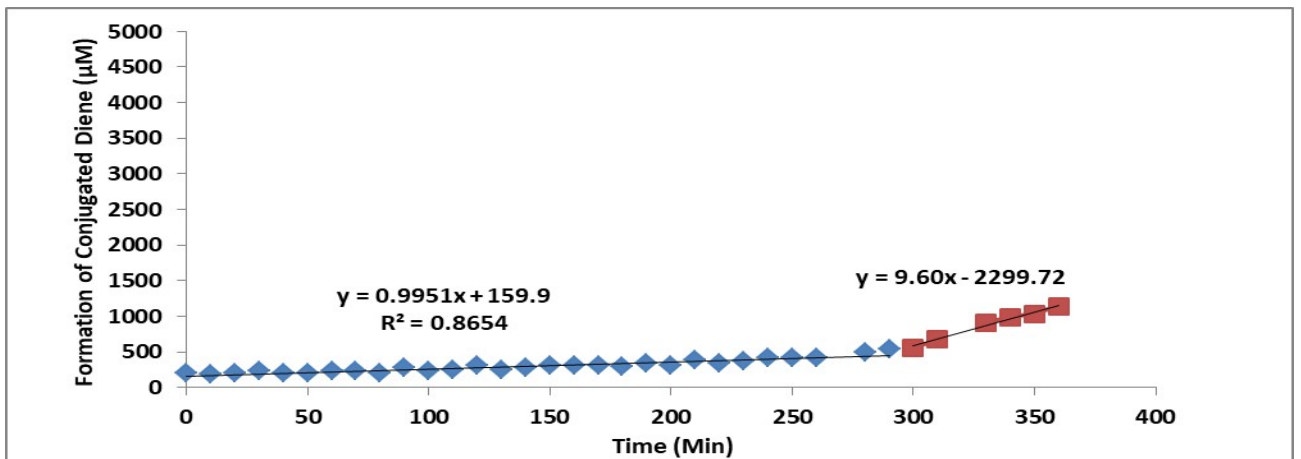

$R_{\text{inh}} = 59.7 \mu\text{M}/\text{Min}$        $T_{\text{inh}} = 281 \text{ Min}$

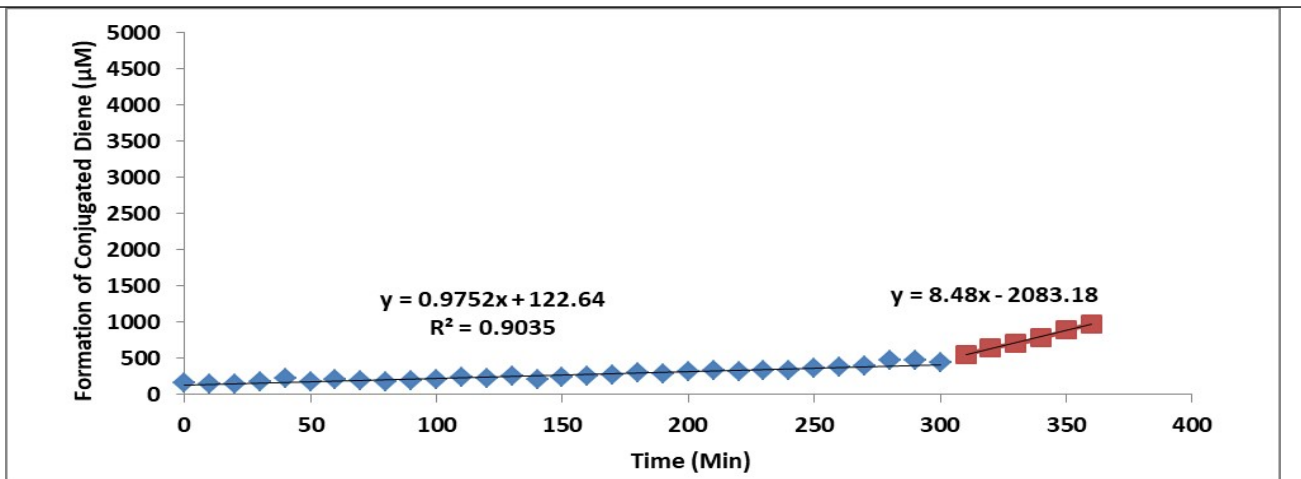

$R_{\text{inh}} = 58.5 \mu\text{M}/\text{Min}$        $T_{\text{inh}} = 289 \text{ Min}$

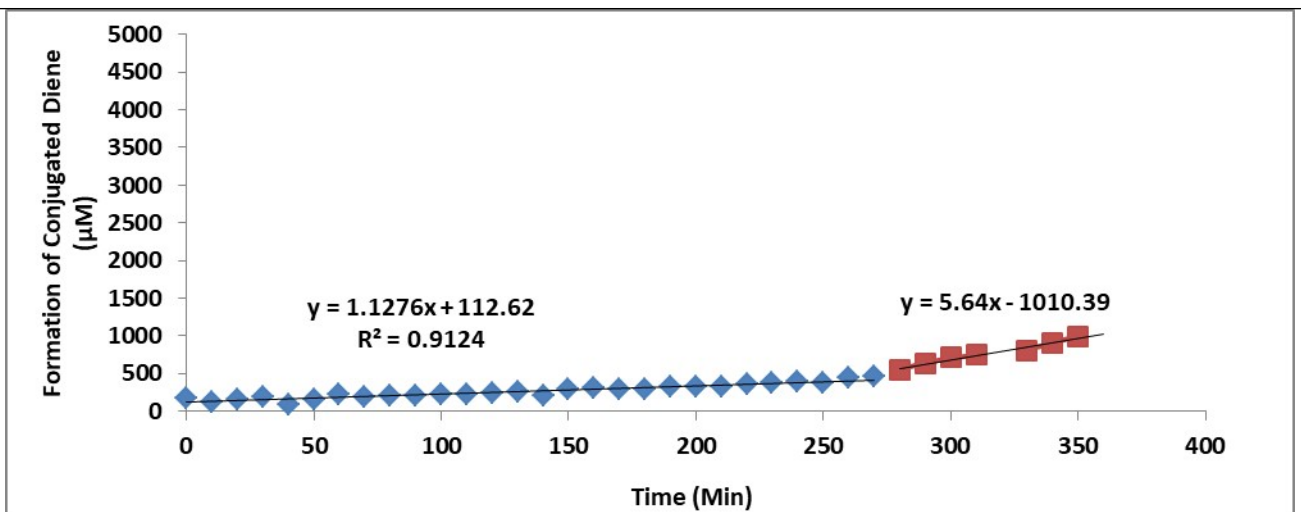

$R_{\text{inh}} = 67.6 \mu\text{M}/\text{Min}$        $T_{\text{inh}} = 270 \text{ Min}$

Figure S39. Experiment with antioxidant 9 using NAC pH 3

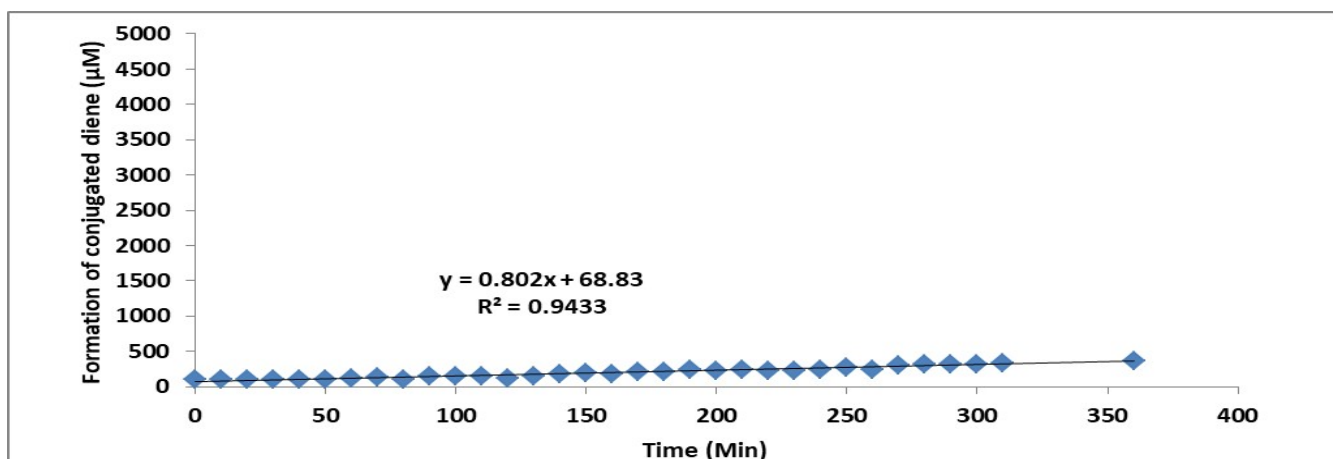

$R_{inh} = 48.12 \mu\text{M}/\text{Min}$   $T_{inh} > 360 \text{ Min}$

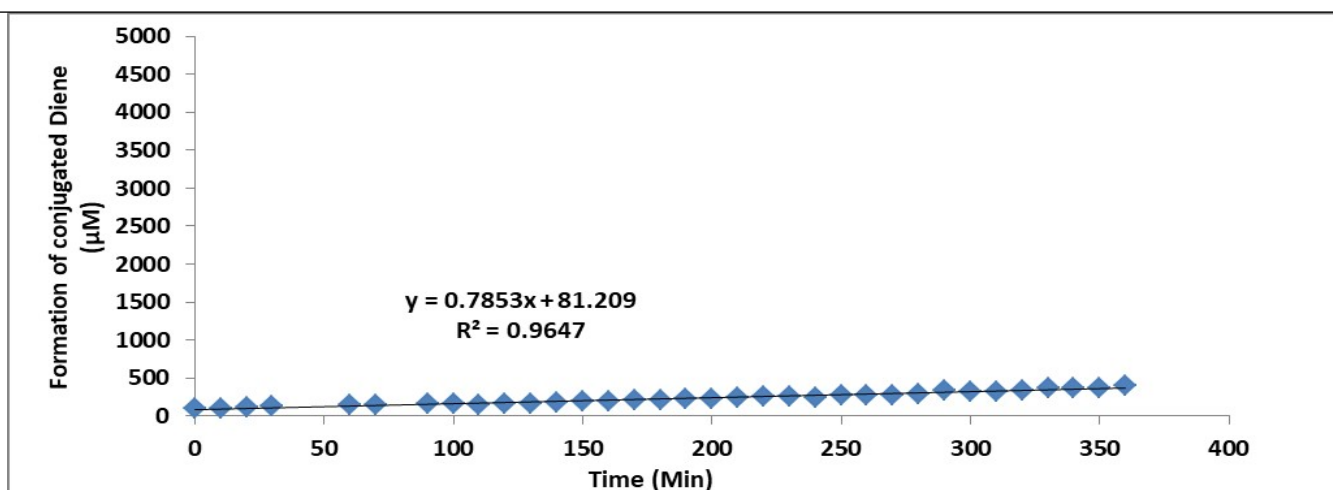

$R_{inh} = 47.1 \mu\text{M}/\text{Min}$   $T_{inh} > 360 \text{ Min}$

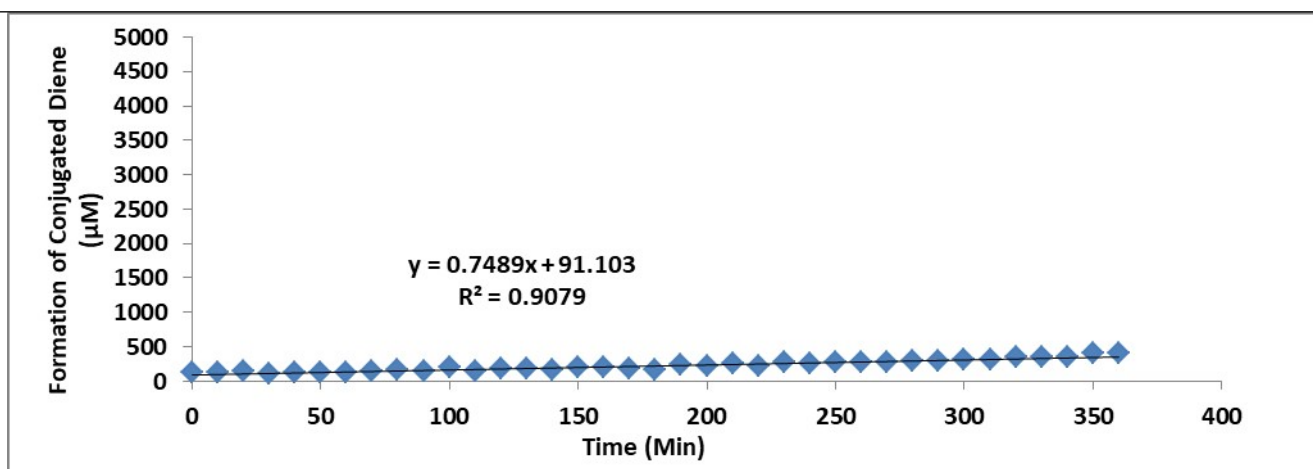

$R_{inh} = 44.88 \mu\text{M}/\text{Min}$   $T_{inh} > 360 \text{ Min}$



**Figure S40.** Experiment with antioxidant 9 using NAC pH 4

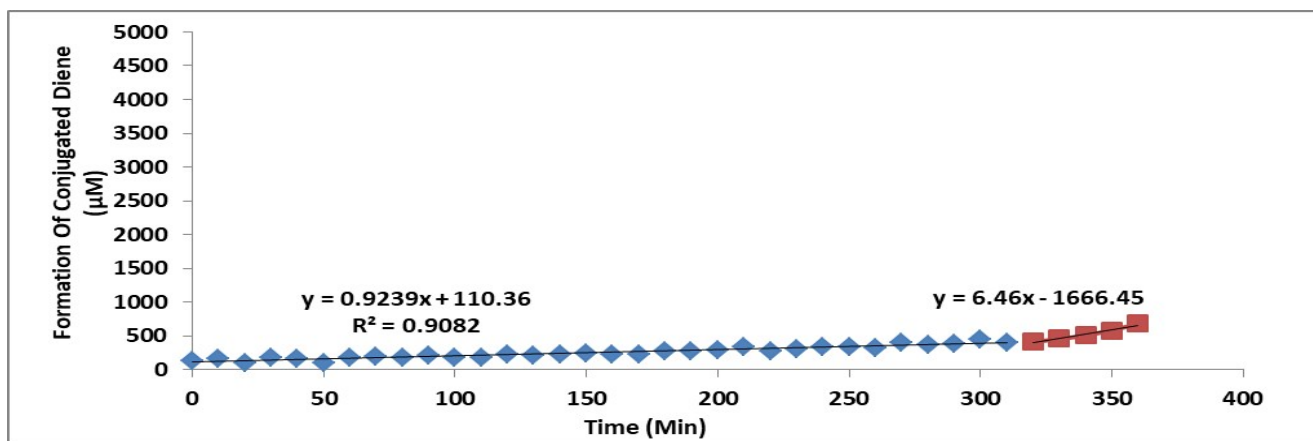

$R_{\text{inh}} = 55.38 \mu\text{M}/\text{Min}$      $T_{\text{inh}} = 310 \text{ Min}$

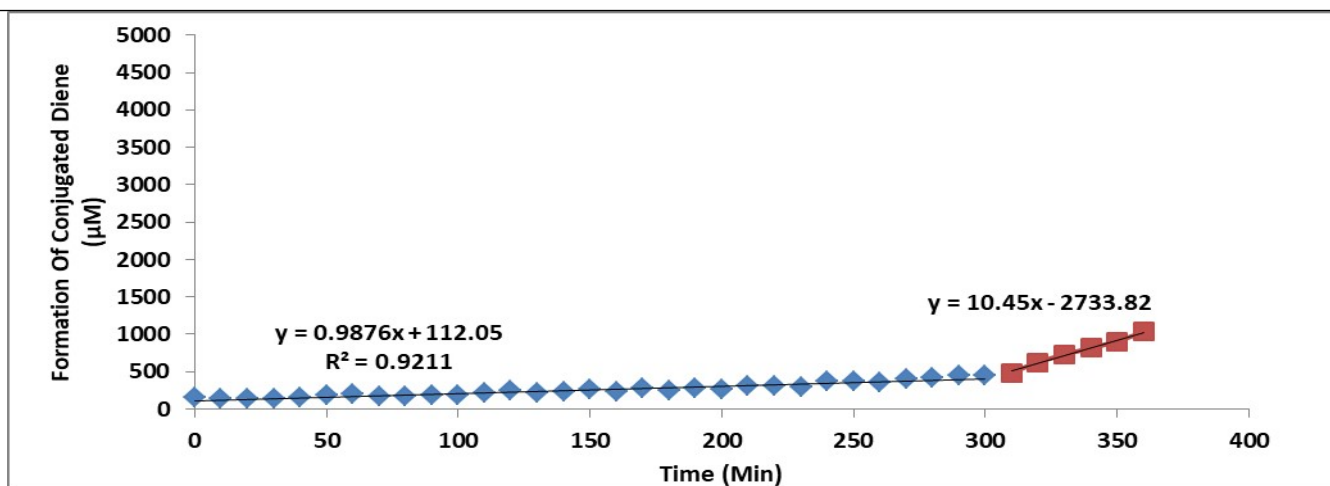

$R_{\text{inh}} = 59.22 \mu\text{M}/\text{Min}$      $T_{\text{inh}} = 301 \text{ Min}$

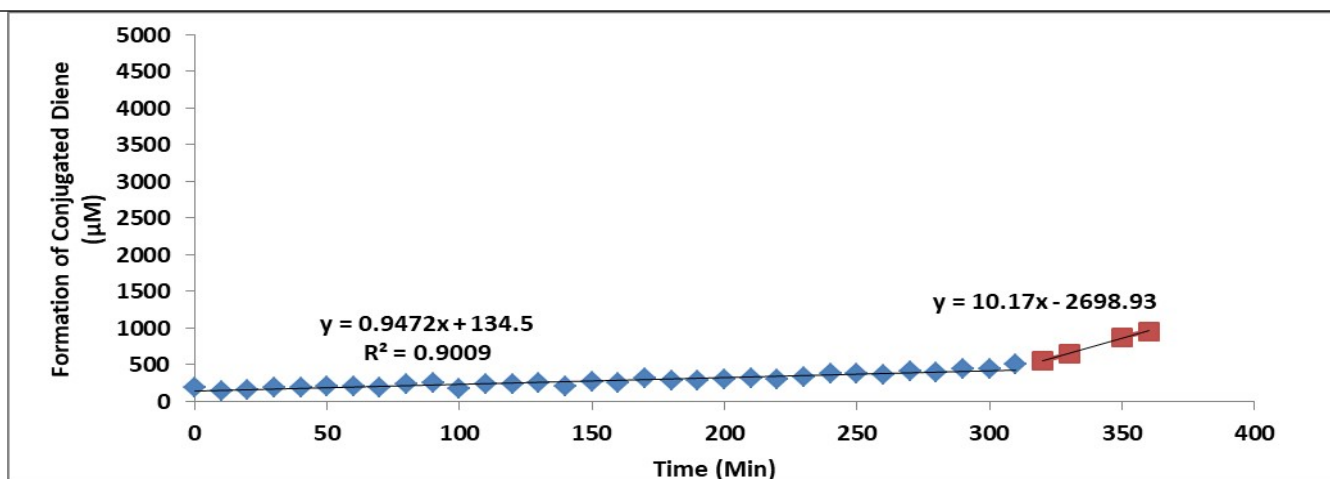

$R_{\text{inh}} = 56.82 \mu\text{M}/\text{Min}$      $T_{\text{inh}} = 306 \text{ Min}$

**Figure S41.** Experiment with antioxidant **9** using NAC pH 5

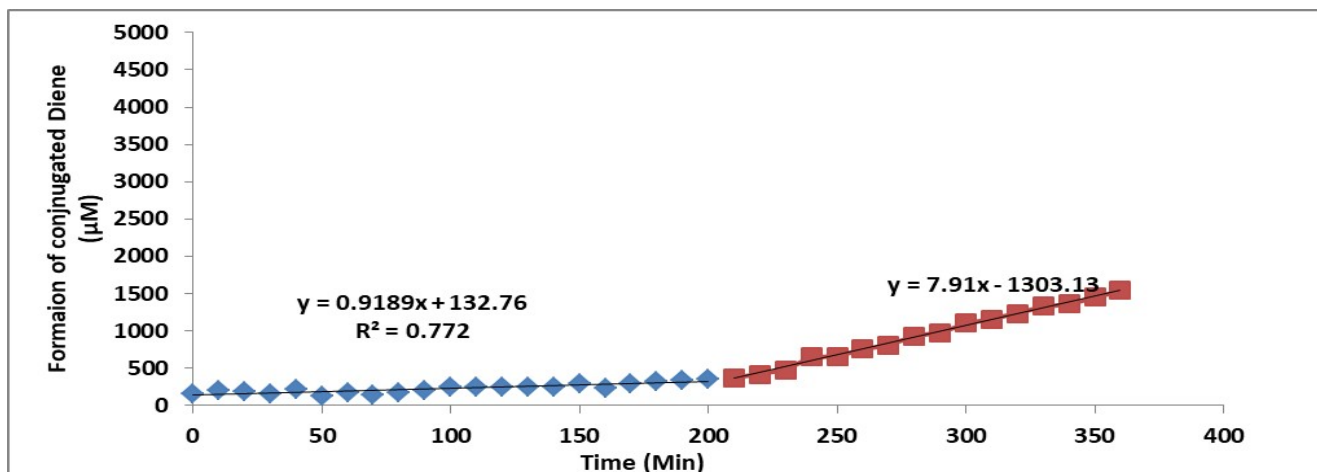

$R_{\text{inh}} = 55.08 \mu\text{M}/\text{Min}$        $T_{\text{inh}} = 205 \text{ Min}$

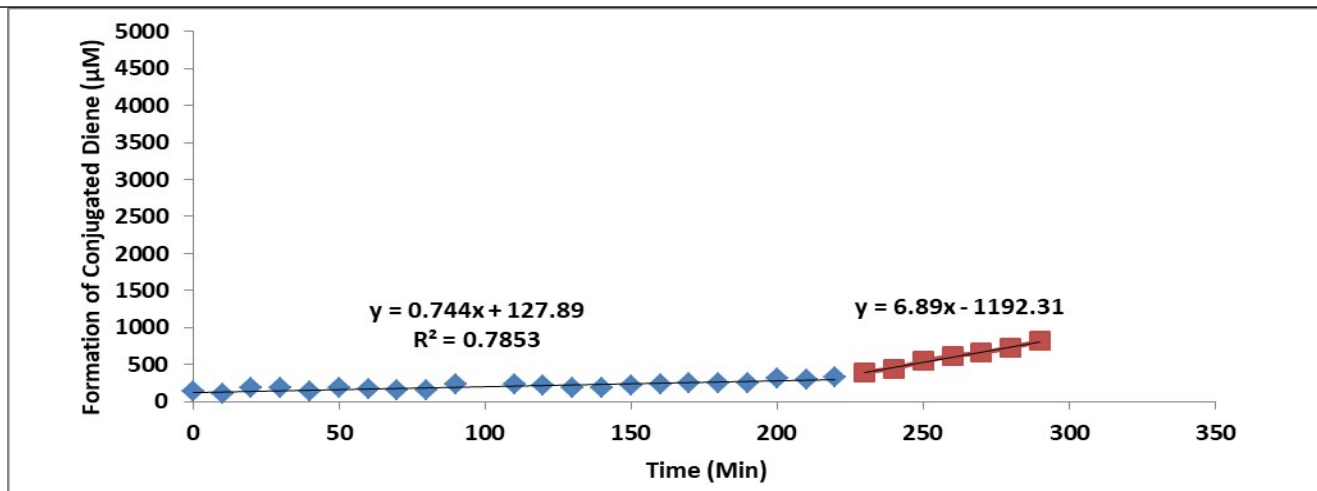

$R_{\text{inh}} = 44.64 \mu\text{M}/\text{Min}$        $T_{\text{inh}} = 214 \text{ Min}$

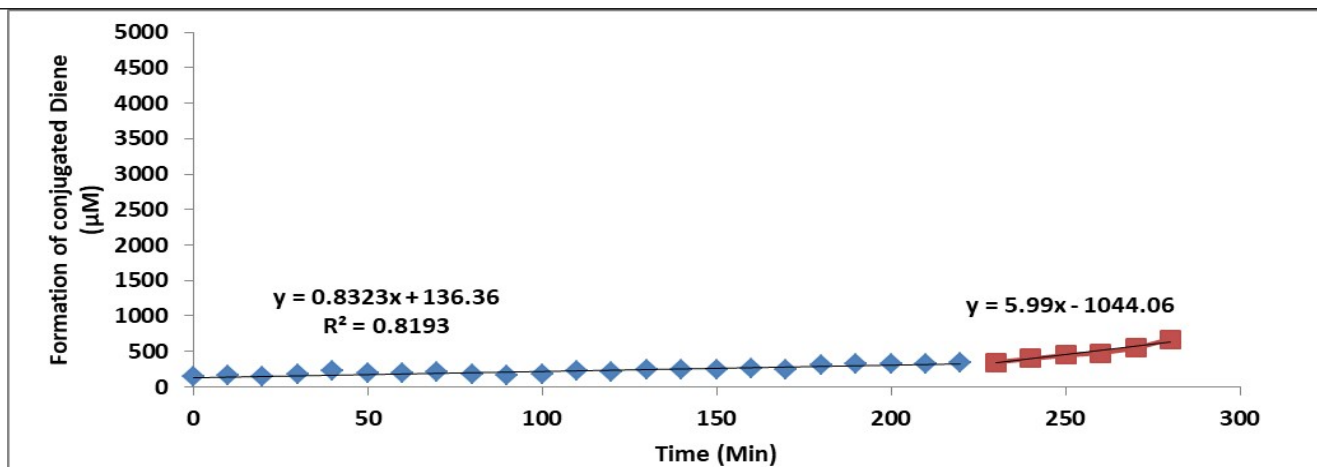

$R_{\text{inh}} = 49.92 \mu\text{M}/\text{Min}$        $T_{\text{inh}} = 220 \text{ Min}$

**Figure S42.** Experiment with antioxidant **9** using NAC pH 6

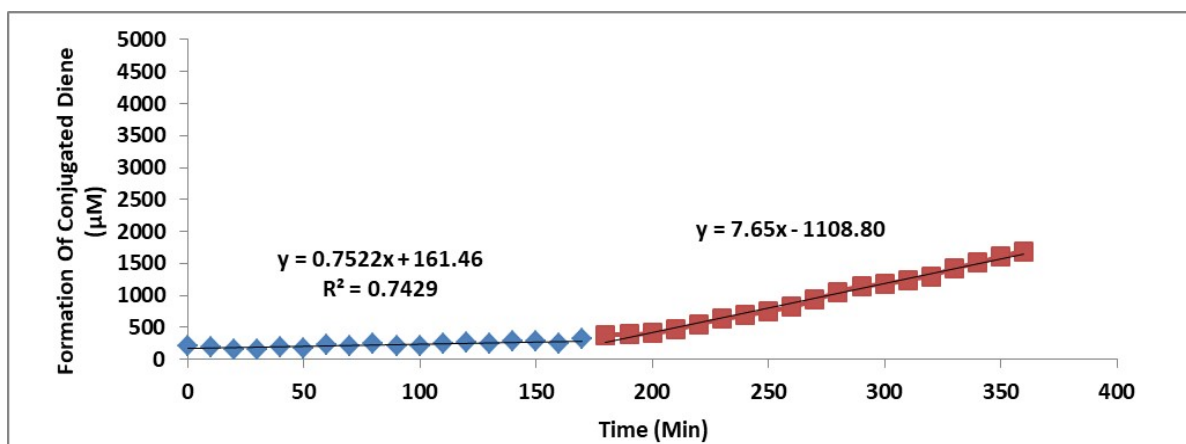

$R_{\text{inh}} = 45.12 \mu\text{M}/\text{Min}$      $T_{\text{inh}} = 184 \text{ Min}$

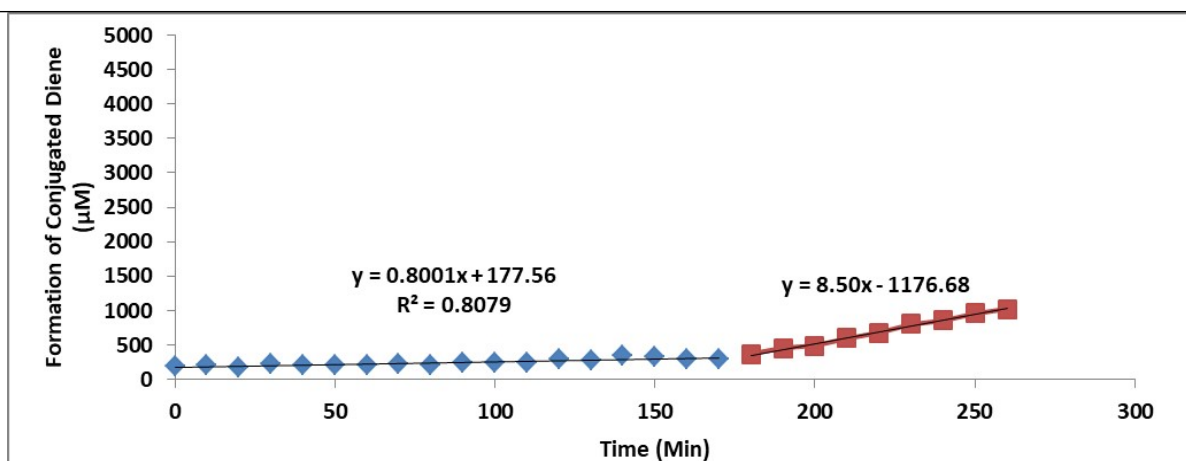

$R_{\text{inh}} = 48 \mu\text{M}/\text{Min}$      $T_{\text{inh}} = 176 \text{ Min}$

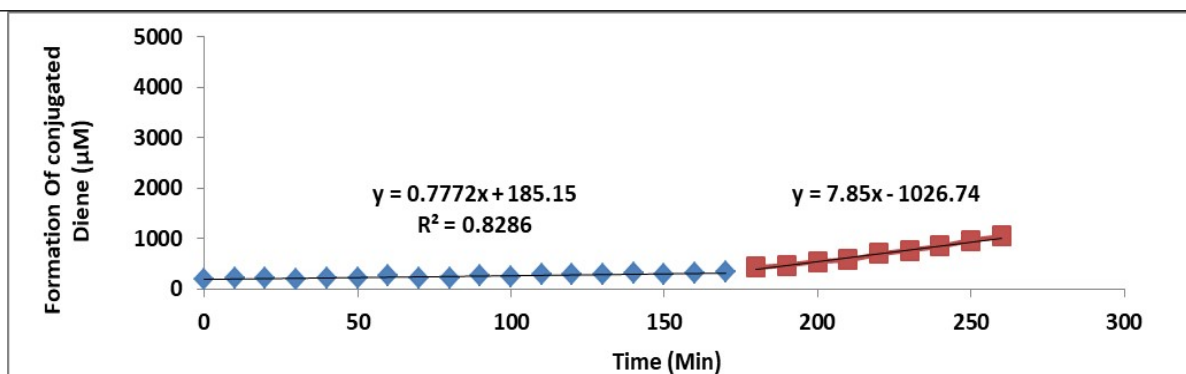

$R_{\text{inh}} = 46.62 \mu\text{M}/\text{Min}$      $T_{\text{inh}} = 171 \text{ Min}$

Figure S43. Experiment with antioxidant 9 using NAC pH 7

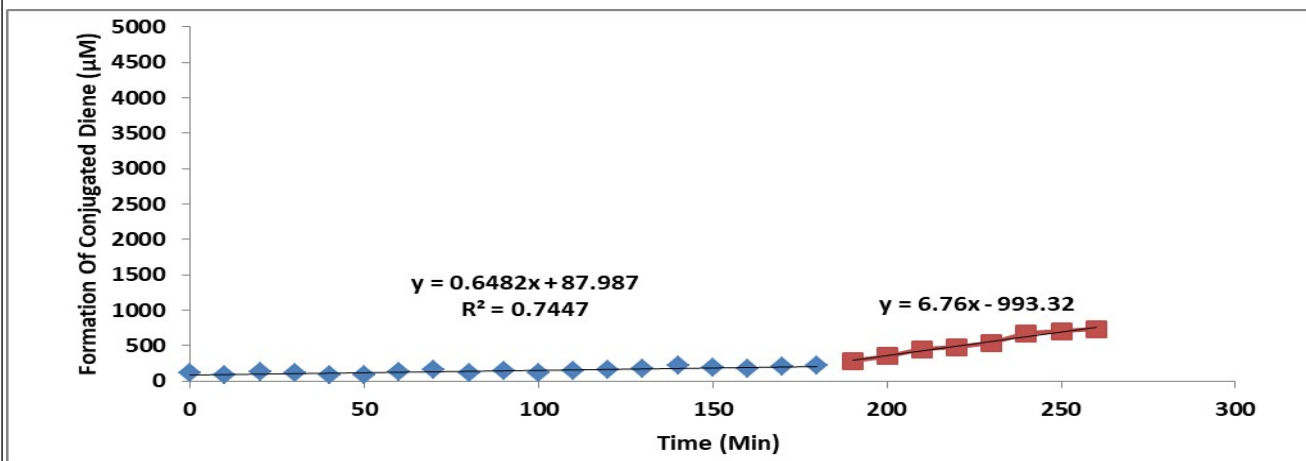

$R_{\text{inh}} = 38.9 \mu\text{M}/\text{Min}$      $T_{\text{inh}} = 177 \text{ Min}$

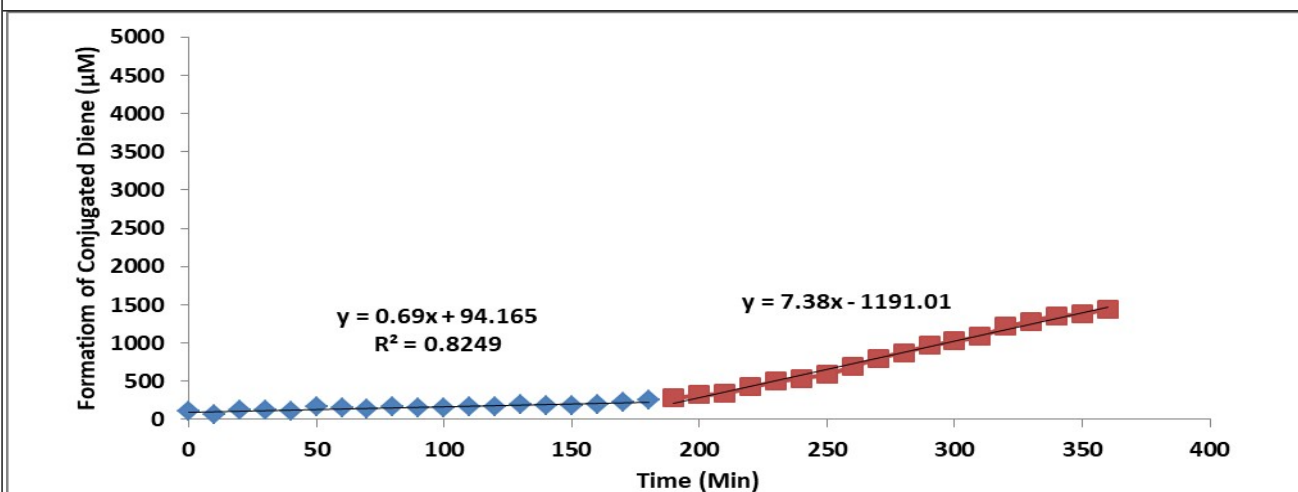

$R_{\text{inh}} = 41.4 \mu\text{M}/\text{Min}$      $T_{\text{inh}} = 193 \text{ Min}$

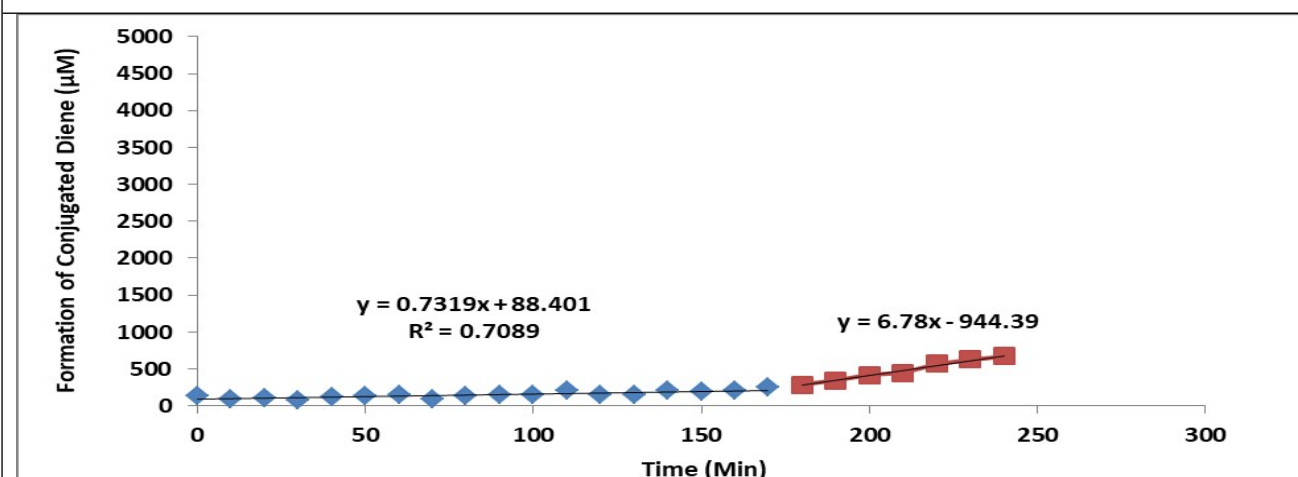

$R_{\text{inh}} = 43.9 \mu\text{M}/\text{Min}$      $T_{\text{inh}} = 171 \text{ Min}$

**Scheme S1.** Proposed mechanism for the quenching of  $\text{LOO}\cdot$  by antioxidant **9** in the presence of aqueous co-antioxidants.

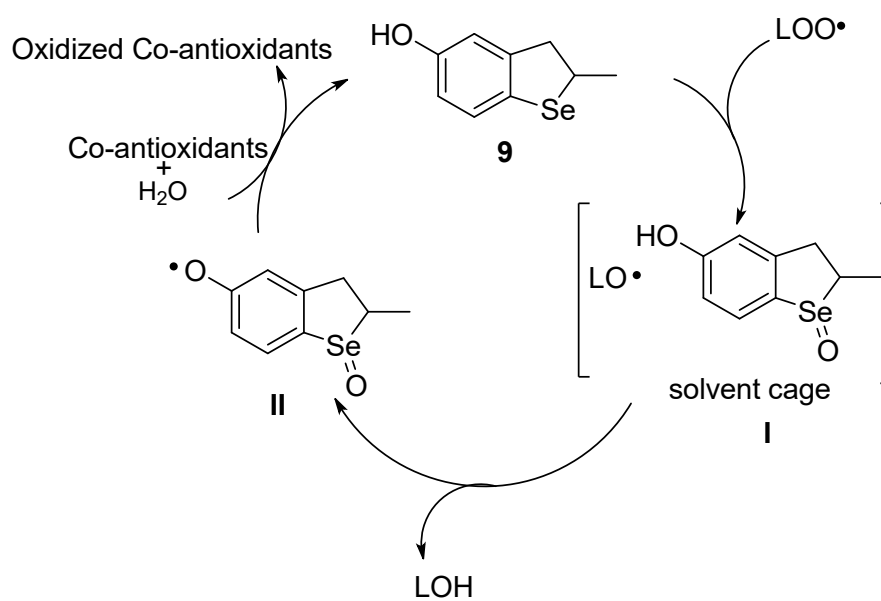

Supplement: d2ob01988d1.pdf [file d2ob01988d1.pdf]
